1  
2  
3  
4  
5  
6  
7  
8  
9  
10  
11  
12  
13  
14  
15  
16  
17  
18  
19  
20  
21  
22  
23  
24  
25

DLK-dependent biphasic reactivation of herpes simplex virus latency established in the absence of antivirals

Sara Dochnal<sup>1</sup>, Husain Y. Merchant<sup>2,3</sup>, Austin R. Schinlever<sup>1,4</sup>, Aleksandra Babnis<sup>1,5</sup>, Daniel P. Depledge<sup>2,6,7</sup>, Angus C. Wilson<sup>2</sup> and Anna R. Cliffe<sup>1,\*</sup>.

1. Department of Microbiology, Immunology and Cancer Biology, University of Virginia, Charlottesville, VA, USA.
2. Department of Microbiology, New York University School of Medicine, New York, NY, USA.
3. Present address: Institute of Cellular Medicine, Newcastle University, United Kingdom
4. Present address: Department of Microbiology, New York University School of Medicine, New York, NY, USA.
5. Present address: Technical University of Munich, School of Medicine, Institute of Virology, Munich, Germany.
6. Present address: Institute of Virology, Hannover Medical School, Hannover, Germany.
7. Present address: German Center for Infection Research (DZIF), partner site Hannover-Braunschweig, Hannover, Germany.

\* Correspondence to Anna R. Cliffe, [cliffe@virginia.edu](mailto:cliffe@virginia.edu)

Running title: A novel in vitro model of HSV latency and reactivation

26 **Abstract**

27 Understanding the molecular mechanism of herpes simplex virus type 1 (HSV-1) latent  
28 infection and reactivation in neurons requires the use of model systems. However,  
29 establishing a quiescent infection in cultured neurons is problematic as infectious virus  
30 released from any productively infected neuron can superinfect the cultures. Here, we  
31 describe a new reporter virus, HSV-1 Stayput-GFP, that is defective for cell-to-cell  
32 spread and can be used to model latency and reactivation at the single neuron level.  
33 Importantly, quiescent infection of neurons with Stayput-GFP can be established without  
34 the use of a viral DNA replication inhibitor. The establishment of a quiescent state  
35 requires a longer time frame than previous models of HSV latency using DNA  
36 replication inhibitors. This results in a decreased ability of the virus to reactivate, and the  
37 use of multiple reactivation triggers is required. Using this system, we demonstrate that  
38 an initial Phase I wave of lytic gene expression occurs independently of histone  
39 demethylase activity and viral DNA replication but is dependent on the neuronal cell  
40 stress protein, DLK. Progression into the later, Phase II wave of reactivation,  
41 characterized by detectable late viral protein synthesis and a requirement for histone  
42 demethylase activity, is also observed with the Stayput-GFP model system. These data  
43 demonstrate that the two waves of viral gene expression following HSV-1 reactivation  
44 are independent of secondary infection and occur when latent infections are established  
45 in the absence of a viral DNA replication inhibitor.

46

47

48

49 **Importance**

50 Herpes simplex virus-1 (HSV-1) enters a latent infection in neurons and periodically  
51 reactivates. Reactivation manifests as a variety of clinical symptoms. Studying latency  
52 and reactivation *in vitro* is invaluable, allowing the molecular mechanisms behind both  
53 processes to be targeted by therapeutics that reduce the clinical consequences. Here,  
54 we describe a novel *in vitro* model system using a cell-to-cell spread defective HSV-1,  
55 known as Stayput-GFP, which allows for the study of latency and reactivation at the  
56 single neuron level. We anticipate this new model system will be an incredibly valuable  
57 tool for studying the establishment and reactivation of HSV-1 latent infection *in vitro*.  
58 Using this model, we find that initial reactivation events are dependent on cellular stress  
59 kinase DLK, but independent of histone demethylase activity and viral DNA replication.  
60 Our data therefore demonstrate the essential role of DLK in mediating a wave of lytic  
61 gene expression unique to reactivation.

62

## 63 **Introduction**

64 Herpes simplex virus 1 (HSV-1) is a globally prevalent pathogen with the capacity to  
65 infect both sensory and autonomic neurons (1-4) . Following neuronal infection, HSV-1  
66 can enter a lytic replication cycle, establish a lifelong latent infection, or potentially  
67 undergo a limited amount of lytic gene expression even prior to latency establishment  
68 (5-13). While latency is largely asymptomatic, periodic reactivation of the virus can  
69 result in cutaneous lesions, keratitis, and encephalitis. Epidemiological studies have  
70 also linked HSV infection with an increased risk of developing late onset Alzheimer's  
71 disease (14-22).

72

73 The regulated expression of viral lytic transcripts has been well characterized following  
74 lytic infection (23-25). The HSV-1 genome enters the host cell epigenetically naked (26-  
75 28) but becomes chromatinized by histones bearing transcriptionally permissive histone  
76 modifications (29-38). Viral gene expression is initiated from the genome in response to  
77 viral trans-activator and tegument protein VP16, which forms a complex with cellular  
78 factors involved in transcriptional activation, including general transcription factors, ATP-  
79 dependent chromatin remodelers, and histone modifying enzymes to promote  
80 expression of immediate-early (IE) genes (32, 39-43). Synthesis of the IE proteins is  
81 required for early (E) mRNA transcription. Products of the early viral genes enable viral  
82 DNA replication. Viral genome synthesis is a pre-requisite for true-late (TL) mRNA  
83 transcription, likely due to a shift in genome accessibility and increased binding of host  
84 transcriptional machinery (44). In contrast to productive infection, during HSV-1 latency,  
85 viral lytic mRNAs are largely transcriptionally repressed and promoters assemble into

86 silent heterochromatin marked by the tri-methylation of histone H3 lysine 27  
87 (H3K27me3) and di/tri-methylation of histone H3 on lysine 9 (H3K9me2/3) (45-50). The  
88 initiation of viral gene expression during reactivation is induced from a heterochromatin-  
89 associated viral genome and occurs in the absence of viral activators like VP16. Latent  
90 HSV-1 therefore relies on host factors to act on the epigenetically silent viral genome  
91 and induce lytic gene expression.

92

93         The mechanisms that regulate entry into lytic gene expression to permit  
94 reactivation remain elusive. Using primary neuronal models of HSV-1 latent infection,  
95 reactivation has been found to progress in a two-step or bi-phasic manner. Phase I is  
96 characterized as a synchronous wave of lytic viral transcripts, occurring approximately  
97 20 hours post-stimulus (25, 51-54). There is evidence that this initial induction of lytic  
98 gene expression is not dependent on the lytic trans-activator VP16, or viral protein  
99 synthesis (25, 55). Instead, cellular factors, including the stress kinases dual leucine  
100 zipper kinase (DLK) and c-Jun N terminal kinase (JNK), are required for Phase I entry  
101 (52, 54). Importantly, viral gene expression occurs despite the persistence of  
102 heterochromatin on viral promoters. Instead, JNK-dependent histone phosphorylation of  
103 histone H3S10 results in a methyl/phospho switch, which can permit gene expression  
104 even while the repressive H3K9me3 histone modification is maintained (52). The  
105 second wave of viral lytic gene expression, Phase II, occurs approximately 48 hours  
106 post-stimulus. Phase II reactivation is characterized by the full transcriptional viral  
107 cascade, including viral DNA replication, and ultimately infectious virus production (25).

108 In contrast to Phase I, viral protein synthesis, heterochromatin removal, VP16-mediated  
109 transactivation, and viral DNA replication are required for Phase II (25, 52, 54).

110

111 *In vitro* systems of HSV-1 latency are required to study the mechanisms of  
112 latency establishment and reactivation that cannot be easily studied *in vivo* (56-59). *In*  
113 *vitro* models more readily enable to functional studies, and immune system components  
114 can be included to understand how the host immune response impacts latency and  
115 reactivation (60, 61). However, there are complications involved in establishing latency  
116 *in vitro*. As also observed in animal models, only a sub-population of infected neurons  
117 enter a latent state whereas other neurons become lytically infected (11, 62-64). This  
118 leads to superinfection of the cultures and an inability to establish a latent infection.  
119 Therefore, many existing *in vitro* models have used viral DNA replication inhibitors,  
120 predominantly acyclovir (ACV), to establish latency *in vitro* (52, 65-70). ACV is proposed  
121 to inhibit viral DNA replication by incorporating into actively replicating viral genomes in  
122 lytic cells, although there is also evidence from ACV-resistant strains that ACV can also  
123 inhibit the viral DNA polymerase (71-73). There are some caveats associated with ACV  
124 use as the process of DNA replication and subsequent late gene expression cannot be  
125 studied in lytic neurons during latency establishment. Moreover, the fate of any  
126 genomes that incorporate ACV is unknown. Therefore, new model systems are required  
127 in which latency establishment can be tracked without the need for viral DNA replication  
128 inhibitors. Such a system can also be used to determine whether the use of ACV in the  
129 cultures alters mechanisms of lytic gene expression during reactivation. Here we  
130 describe the use of a novel HSV-1 reporter virus Stayput-GFP, which provides a

131 powerful new methodology to investigate the establishment and reactivation from latent  
132 infection at the single neuron level without the need for DNA replication inhibitors.  
133

134 **Results**

135 Construction of a gH-null US11-GFP HSV-1.

136 To construct a recombinant HSV-1 that is deficient in cell-to-cell spread and can  
137 also be used to visualize cells containing detectable viral late protein, Us11 tagged with  
138 GFP (74) was inserted into an existing glycoprotein H (gH)-null virus, SCgHZ (75) (Fig.  
139 1A). gH is essential for HSV-1 cell entry as it mediates fusion between the virus  
140 envelope and host cell membrane (76, 77). The GFP-tagged true-late protein is a useful  
141 indicator of both lytic infection and reactivation, and Us11-GFP wild-type virus has been  
142 used as such in several HSV-1 latency systems (51, 54, 58, 65, 78, 79). The tagged  
143 virus has previously been reported to express the full complement of HSV-1 genes, as  
144 wild-type Patton strain (74).

145

146 We first verified that the resulting virus (named Stayput-GFP) was deficient in  
147 cell-to-cell spread in non-neuronal and neuronal cells but otherwise undergoes gene  
148 expression and replication as a wild-type virus. The genome sequence and  
149 transcriptome of Stayput-GFP was validated by nanopore gDNA and direct RNA  
150 sequencing, respectively (Fig. 1B-C). As determined through plaque assay, the ability to  
151 produce infectious virus was perturbed in the gH-deletion strains but was rescued using  
152 previously constructed gH-complementing cell line, Vero-F6 (Fig. 1D, Supplemental Fig.  
153 1A). Importantly, replication in this cell line was indistinguishable from the parent  
154 SCgHZ and Us11-GFP Patton strain, which we chose for comparison as this virus has  
155 previously been used for latent infection studies in primary neurons.

156



157 To demonstrate cell-to-cell spread deficiency in neurons, we quantified GFP-  
158 positive neurons over time. Infection of murine sympathetic neurons at an MOI of 0.5  
159 PFU/cell resulted in detectable GFP-positive neurons, which remained constant after 24  
160 hours post-infection (Fig. 1E), while the surrounding GFP-negative neurons remained  
161 GFP-negative (Fig. 1F). This contrasts with the wild-type US11-GFP condition where  
162 the number of lytic-infected neurons increased substantially over time. At 6 hours post-  
163 infection, viral protein ICP4-positive neurons were indistinguishable between SCgHZ,  
164 Stayput-GFP, or wild-type Us11-GFP infected neurons (Supplemental Fig. 1B).  
165 Therefore, Stayput-GFP neuronal infection was equivalent to Us11-GFP upon initial  
166 infection but failed to spread within the neuronal culture.

167

#### 168 Reactivation of Stayput-GFP in a primary neuronal model

169 To confirm that Stayput-GFP undergoes reactivation in a manner comparable to  
170 the backbone SCgHZ, we infected mouse primary sympathetic neurons in the presence  
171 of viral DNA replication inhibitor ACV (52, 65-68). ACV prevents the production of  
172 infectious virus, and thus superinfection of the cultures. Following infection, ACV was  
173 removed, and reactivation was triggered adding a PI3-kinase inhibitor LY294002 (Fig.  
174 2), which mimics loss of a branch of the NGF-signaling pathway in neurons (80) and  
175 has previously been found to induce reactivation (52, 61, 65, 79). Following the addition  
176 of the reactivation stimulus, viral gene expression increased uniformly between Stayput-  
177 GFP, SCgHZ, and wild-type Us11-GFP at 20 hours post-stimulus (Fig. 2C). Viral gene  
178 expression continued to increase from 20 to 48 hours for all three viruses, and GFP-  
179 positive neurons were visible for both GFP-tagged viruses by 48 hours (Fig. 2B, 2D).

180 This indicates that even in the absence of cell-to-cell spread, reactivation progressed  
181 over a 48-hour period, initiating with viral mRNA production and later detection of viral  
182 late protein.

183

184 By 72 hours-post stimulus, GFP and viral gene transcription were significantly  
185 up-regulated in wild-type Us11-GFP in comparison to Stayput-GFP or SCgHZ,  
186 suggesting that at this time-point, the readout of reactivation for wild-type Us11-GFP is  
187 confounded by cell-to-cell spread (Fig. 2B, 2E). We are therefore unable to differentiate  
188 between genuine reactivation and downstream cell-to-cell spread using a wild-type  
189 virus. Previous attempts to reduce cell-to-cell spread include using pooled human  
190 gamma globulin or the viral DNA packaging inhibitor WAY-150138 (65, 81-83).  
191 However, using Stayput-GFP offers a built-in mechanism to prevent cell-to-cell spread  
192 during reactivation and permit quantification of the progression to reactivation at the  
193 single neuron level.

194

195 Stayput-GFP can be used to create a quiescence model of neuronal infection in the  
196 absence of viral DNA replication inhibitors

197 When wild-type virus is used for neuronal infection, superinfection of the cultures  
198 occurs (Fig. 1E), and a latent infection cannot be established. By infecting with Stayput-  
199 GFP, we posited that we could create a model of latency establishment without the use  
200 of DNA replication inhibitors. Following the infection of neonatal sympathetic neurons at  
201 an MOI of 7.5 PFU/cell, the number of GFP-positive neurons emerged by 1-day post-  
202 infection, increased until 3 days post-infection, and then decreased until reaching zero

203 by 30 days post-infection (Fig. 3A). The length of time required for Us11-GFP to be lost  
204 from the cultures was surprising and may result from the previously characterized  
205 restricted cell death in neurons (84), or a gradual shut-off in protein synthesis in a sub-  
206 population of neurons that survive even Late gene expression. Single-cell tracking  
207 demonstrates that most neurons that become GFP-positive also end up staining  
208 positive for cell death marker SYTOX<sup>TM</sup> Orange (Fig. 3B-C). All classes of lytic viral  
209 gene expression emerged by 1-day post-infection and then decreased over the span of  
210 30-days post-infection (Fig. 3D-F). In contrast to the lytic transcripts, LAT expression  
211 was maintained over the infection scheme of 30-40 days and was approximately 400-  
212 fold higher than lytic transcripts from 30 days onwards (Fig. 3G). This indicated that  
213 LAT-positive neurons persisted over this period, likely reflecting entry into quiescence.  
214 In agreement with this hypothesis, at 40 days post-infection there are approximately 200  
215 viral DNA copies per cell, demonstrating that viral genomes persist (Fig. 3H). Together,  
216 these data show that infection of sympathetic neurons with a cell-to-cell defective virus  
217 results in a remaining population of neurons containing viral genomes and the LAT  
218 transcript. Notably, this mimics events following *in vivo* infection of mice.

219

220 We were also interested to determine whether a similar quiescent infection could  
221 be established in adult sensory neurons, as these are also a commonly used model of  
222 HSV-1 infection *in vitro* (62). Following infection with Stayput-GFP in primary trigeminal  
223 ganglia (TG) neurons, GFP also increased by 1-day post-infection and then was lost  
224 over time (Supplemental Fig. 2). GFP was repeatedly lost within 15 days, a shorter  
225 period than that which is observed in neonatal sympathetic neurons. Therefore, the

226 Stayput-GFP virus can be used to establish a quiescent infection of both sympathetic  
227 and sensory neurons *in vitro* without the use of viral DNA replication inhibitors.

228

229 The ability of HSV-1 to undergo reactivation decreases with length of time infected

230 The presence of viral genomes and LAT transcripts suggested that HSV-1 had  
231 established a quiescent infection 30 days post-infection. Therefore, we hypothesized  
232 that some genomes enter latency, which is defined by an ability to reactivate in  
233 response to a stimulus. We thus attempted to reactivate cultures with LY294002 (20  
234  $\mu$ M). However, we were unable to detect an increase in GFP-positive neurons after the  
235 addition of the trigger (Fig. 4A). We were also unable to detect a change in immediate  
236 early, early, or late transcripts (data not shown). This was unexpected as LY294002 has  
237 repeatedly been shown to elicit robust reactivation *in vitro* and was able to induce  
238 Stayput-GFP in a model using ACV to promote latency establishment (Fig. 2).

239 Therefore, we sought to determine whether the inability to induce reactivation was due  
240 to the lack of ACV or the more prolonged time between initial infection and the addition  
241 of the reactivation stimulus. We infected neonatal cultures in the presence of ACV and  
242 reactivated over increasing lengths of time. ACV was removed from all cultures 6 days  
243 post-infection. We found that the number of GFP-positive neurons following addition of  
244 LY294002 decreased as the length of time infected increased (Fig. 4B). This was not  
245 likely due to a loss of viral genomes, as viral genome copy number and LAT expression  
246 remained constant over this period (Fig. 3G-H) and therefore instead reflected a more  
247 repressed viral genome unable to undergo reactivation upon PI3-kinase inhibition.

248

249           Neurons are known to undergo intrinsic maturation, even in culture (85, 86).  
250   Therefore, the increased age of the neuron could have also impacted the ability of HSV-  
251   1 to undergo reactivation. Hence, we investigated how reactivation changed with  
252   increased neuronal maturation (Fig. 4C). We infected cultured neurons with Stayput-  
253   GFP at an MOI of 7.5 at the postnatal (P) ages of P8, P16, and P24 and then  
254   reactivated 8 days later. These postnatal ages of infection were chosen to reactivate at  
255   the same ages of reactivation in Fig 4B. Importantly, we did not detect a decrease in  
256   reactivation output as the age of the neuron increased. Together, these data indicate  
257   that the decreased ability of Stayput-GFP to reactivate in a model that did not require  
258   ACV to establish quiescence was due to the longer time frame of infection and not  
259   associated with a lack of ACV in the cultures or increased age of the neuron.

260

261   Viral gene expression can be induced following long-term quiescent infection when  
262   multiple triggers are combined

263           We next sought to determine whether other known stimuli of HSV-1 reactivation  
264   could induce Us11-GFP expression, indicative of entry into reactivation. We attempted a  
265   number of triggers including forskolin (87-90) and heat-shock/hyperthermia (91-98),  
266   which are both known inducers of HSV-1 reactivation. Alone these stimuli did not induce  
267   Us11-GFP expression or viral lytic mRNA induction (data not shown). However, when  
268   heat-shock (43°C for 3h), in addition to forskolin (30 µM) and LY294002 (both pulsed for  
269   20 hours) were combined, Us11-GFP positive neurons were detected at 48 hours post-  
270   stimulus, indicating progression to reactivation (Fig. 5A). Superinfection was also used  
271   as this can induce rapid and robust reactivation, likely resulting in delivery of viral

272 tegument proteins. In comparison to superinfection, the combined heat-  
273 shock/forskolin/LY294002 trigger resulted in reduced entry into reactivation/Us11-GFP  
274 expression, indicating that only a sub-population of neurons undergo reactivation with  
275 this combined trigger, which is consistent with previous studies investigating the  
276 mechanism of HSV-1 reactivation both *in vivo* and *in vitro* (25, 66, 99, 100). Importantly,  
277 GFP-positive neurons at 48 hours post-stimulus co-stained with viral immediate early  
278 protein ICP4, early protein ICP8, as well as late capsid protein ICP5 (Supplemental Fig  
279 3). ICP8 staining appeared to form replication compartments, suggesting viral DNA  
280 replication occurs at this time. ICP5 capsid staining was also detectable in GFP-positive  
281 axons.

282

283 We went on to investigate whether viral mRNA expression was induced prior to  
284 the detection of Us11-GFP positive neurons. Using the triple stimulus, we detected an  
285 increase in viral lytic transcripts as early as 10 hours post-stimulus, which continued to  
286 increase, peaking at 48 hours post-stimulus (Fig. 5B-D, Supplemental Fig. 4). Detection  
287 of immediate-early and early transcripts was slightly more robust than late transcripts,  
288 although all late transcripts were significantly induced by 20 hours post-stimulus (Fig.  
289 5D, Supplemental Fig. 4B-E).

290

291 We also confirmed that the triple combinatorial stimulus elicits robust GFP re-  
292 emergence in adult TGs (Fig. 5E). Similar to what we observed in the sympathetic  
293 neurons, Us11-GFP positive neurons were detected by 48 hours post-stimulus.  
294 Intriguingly, superinfection only induced GFP expression to equivalent levels as the

295 triple stimuli, which may be reflective of the repressive nature of sub-population of  
296 mature sensory neurons to lytic replication and reactivation (62, 63). Together, these  
297 data indicate that *in vitro* models of latency and reactivation can be established in  
298 sympathetic and sensory neurons in the absence of ACV and reactivation can be  
299 induced using a combination of triggers. In both models, a wave of lytic mRNA  
300 expression was detected prior to the appearance of Us11-GFP positive neurons (Fig. 5  
301 F-H, Supplemental Figure 5).

302

### 303 Neurons infected with Stayput-GFP undergo a DLK-dependent Phase I of reactivation

304 Phase I reactivation has largely been investigated using *in vitro* models in which  
305 ACV has been used to promote latency establishment. In addition, Phase I has been  
306 found to occur with the single triggers of forskolin or LY294002 (25, 52, 54). The  
307 requirement of multiple triggers for reactivation suggested that multiple cell-signaling  
308 pathways converged to have a synergistic effect and induce reactivation in this more  
309 repressive model. Therefore, we were interested to determine whether the  
310 characteristics of Phase I reactivation occurred in the model of quiescent infection  
311 established in the absence of ACV and using the more robust trigger to induce  
312 reactivation. Potential Phase I viral transcription was investigated at 12.5 hours post-  
313 stimulus by RT-qPCR and Phase II was investigated when Us11-GFP positive neurons  
314 could be detected (48 hours post-stimulus). A characteristic of Phase I expression is the  
315 requirement of the stress kinase dual leucine zipper kinase (DLK) (52, 54). Therefore,  
316 using the DLK-specific inhibitor GNE3511 4  $\mu$ M (101), we investigated the effect of DLK  
317 on reactivation in our system. We found up-regulation of immediate early/early

318 transcripts 12.5 hours post-stimulus was eliminated with the addition of the DLK inhibitor  
319 (Fig. 6A-C). Further, full reactivation, demonstrated by peak GFP expression at 48  
320 hours, was also reduced to baseline levels upon the addition of the DLK inhibitor (Fig.  
321 6D). Therefore, using our new model of HSV-1 latency our data demonstrate that the  
322 initiation of viral lytic gene expression is dependent on DLK activity.

323

324 In addition to the dependence on DLK activity, a further characteristic of Phase I  
325 gene expression is the induction of viral mRNA transcripts independently of the activity  
326 of histone de-methylase enzymes required for full reactivation. Therefore, we also  
327 triggered reactivation in the presence of de-methylase inhibitors. GSK-J4 is known to  
328 specifically inhibit the H3K27 histone demethylases UTX and JMJD3 (102) and has  
329 previously been found to inhibit HSV-1 reactivation but not Phase I gene expression  
330 (52, 54). OG-LOO2 is an LSD1 specific inhibitor. LSD1 has previously been shown to  
331 be involved in removal of H3K9me2 from HSV-1 genomes and its activity is required for  
332 full reactivation but not Phase I gene expression (41, 52, 54). Full reactivation was  
333 reduced in the presence of OG-LOO2 or GSK-J4 as demonstrated by GFP-positive  
334 neurons at 48 hours (Fig. 7C). However, the initial expression of lytic transcripts at 12.5  
335 hours post-stimulation was not inhibited by either OG-LOO2 or GSK-J4 (Fig. 7A-B).  
336 Therefore, the initiation of gene expression in a manner that is independent of histone  
337 demethylase activity occurs when reactivation is induced by a triple stimulus and in a  
338 primary neuronal model in which latency was established without ACV.

339



340           During Phase I, there is no detectable replication of viral genomes even though  
341 true late gene expression occurs (52, 54). In addition, using ACV models to establish  
342 latency, late gene expression has previously been found to occur to equivalent levels  
343 when viral DNA replication is inhibited during reactivation. Although we did observe late  
344 gene expression during the initial period of lytic gene induction (12.5-20 hours), the  
345 increase was less robust than IE and E genes and appeared slightly delayed, not  
346 reaching significance for all analyzed late transcripts until 24 hours post-stimulus (Fig.  
347 5D, Supplemental Fig. 3). Therefore, we investigated whether this late gene induction  
348 was dependent on viral DNA replication by reactivating in the presence of ACV. The  
349 addition of ACV inhibited entry in full reactivation, demonstrated by Us11-GFP positive  
350 neurons at 48 hours post-stimulus, indicating that ACV was capable of blocking robust  
351 late gene expression at this late time-point (Fig. 8D). However, the addition of ACV did  
352 not inhibit the induction of lytic transcripts at 22 hours post-stimulus. Importantly, we  
353 included multiple true Late genes in this analysis and all were induced to equivalent  
354 levels in the presence and absence of ACV (Fig. 8A-C, Supplemental Fig 6). Therefore,  
355 the initial expression of late genes following a reactivation stimulus is independent of  
356 viral DNA replication. In summary, using a model system in which a quiescent infection  
357 is established without the need for ACV, all the previous characteristics of Phase I gene  
358 expression (dependence on DLK and independence of histone demethylase activity and  
359 viral DNA replication) were still observed.

360

361

## 362 **Discussion**

363           We envision multiple uses for the Stayput-GFP virus model developed here for  
364 investigating HSV-1 neuronal infection *in vitro*. The Stayput-GFP virus is advantageous  
365 in models that otherwise use DNA replication inhibitors to promote latency  
366 establishment because it allows for the separation of initial viral gene expression/protein  
367 synthesis events and readouts from events that result from cell-to-cell spread. In  
368 addition, even in systems where ACV is used, there can be low levels of lytic replication  
369 or spontaneous reactivation after removal of ACV from cultures. The use of Stayput-  
370 GFP helps limit the confounding effects of spontaneous reactivation events by inhibiting  
371 subsequent cell-to-cell spread, while at the same time identifying neurons that escape  
372 quiescence. Further, the GFP tag serves as an imaging indicator in real time of when *de*  
373 *novo* lytic infection is resolved and latency is considered established. We are also able  
374 to track viral DNA replication and downstream late viral transcription and protein  
375 synthesis during the latency establishment process *in vitro*. The fate of lytic neurons,  
376 whether they undergo cell death or turn off gene expression programs and enter the  
377 latency pool, can also be investigated by tracking GFP and cell death at a single-cell  
378 level.

379  
380           There are limitations to our system. Although there is some discrepancy in what  
381 defines reactivation (103), it is ultimately defined by the production of infectious virus.  
382 Due to the nature of the gH-deletion virus, *de novo* virus is by design non-infectious and  
383 we are unable to demonstrate reactivation in its strictest definition. That said, we can

384 readily demonstrate the re-emergence of all classes of viral gene transcripts, synthesis  
385 of viral capsid protein and replication compartment formation.

386

387 An intriguing finding in our study is that reactivation output decreases as length of  
388 infection increases. A potential explanation is that the viral genome becomes  
389 increasingly chromatinized over time, leading to a more repressive phenotype. In  
390 support of this hypothesis, the association of the facultative heterochromatin mark  
391 H3K27me3 with the HSV-1 genome increases dramatically between 10- and 15-days  
392 post-infection *in vivo* (46). The kinetics of H3K27me3 deposition remain to be  
393 investigated *in vitro*, but if they are mirrored this could suggest that active  
394 chromatinization and reinforcement of silencing continues even after initial shut-down of  
395 viral gene expression. In the cellular context, H3K27me3 is linked with the recruitment  
396 of canonical polycomb repressor complex 1 (cPRC1), which may reinforce silencing  
397 through long-range chromosomal interactions or 3D compaction (50, 104, 105). It is  
398 therefore possible that even following H3K27me3 formation on the genome, there are  
399 additional layers of protein recruitment that build up over time. In addition, it is also  
400 possible that the accumulation of viral non-coding RNAs expressed in latency could  
401 impact cellular pathways resulting in decreased signaling to the viral genome for  
402 reactivation. The use of the Stayput-GFP model system will permit these different  
403 avenues to be explored.

404

405 Our model system recapitulates the hallmarks of reactivation Phase I, which has  
406 previously been explored in *in vitro* systems using a DNA replication inhibitor. These

407 data are interesting considering the discrepancies in conclusions drawn about  
408 reactivation between *in vitro* and *in vivo* modeling. There is evidence *ex vivo* for a  
409 Phase I as all classes of viral gene are expressed in a disordered, non-cascade fashion  
410 when a combination of explant and nerve-growth factor deprivation are used (106).  
411 However, in other models of reactivation *ex vivo*, there is evidence that Phase-I-like  
412 gene expression may not occur, especially from studies investigating the requirement  
413 for histone demethylase inhibitors. These latter experiments used explant (axotomy) to  
414 induce reactivation and found that the earliest induction of lytic gene expression is  
415 dependent on lysine 9 demethylase activity (40, 41). In a recent study from our lab, we  
416 have found that Phase I reactivation can occur *ex vivo* when axotomy is combined with  
417 PI3-kinase inhibition, although with more rapid kinetics than those observed here (107).  
418 These discrepancies between may result from the different trigger used to induce  
419 reactivation or currently unknown effects of latency established *in vivo*. Importantly, here  
420 we have demonstrated that any potential differences between *in vivo* and *in vitro*  
421 observations on the mechanisms of reactivation do not result from the use of ACV to  
422 establish a quiescent infection. Further work using the Stayput-GFP model system will  
423 help elucidate how changes in the host immune response, neuronal subtype, and  
424 stimulus used can potentially alter the mechanisms of viral gene expression during  
425 reactivation.

426

427 Phase I, in addition to occurring synchronously and independently of histone  
428 demethylases, also occurs in the absence of viral protein synthesis. In an *in vitro* model  
429 employing ACV during latency establishment and stimulus LY294002 during

430 reactivation, it is demonstrated that initial viral transcription occurs before the  
431 appearance of viral late protein synthesis and, specifically, independently of viral  
432 transactivator VP16 (25, 51). Therefore, cellular host factors must be responsible for  
433 instigating the initial reactivation process. Evidence from an *in vitro* model system has  
434 demonstrated these events are in fact navigated by cellular proteins JNK and DLK (52).  
435 Interestingly, host cell proteins may also be implicated in restricting the full reactivation  
436 process, including Gadd45b which appears to antagonize the HSV-1 late expression  
437 program to prevent full reactivation (51). Interestingly, Gadd45b mRNA is increased in  
438 response to LY294002 only in infected neurons, suggesting perhaps that a viral factor  
439 may be mediating the gatekeeping from Phase I to Phase II reactivation.

440

441 In our system, Phase I gene expression was dependent on the neuronal  
442 regulator of JNK activity, DLK, highlighting the central role of DLK in HSV-1 reactivation.  
443 DLK is a cell protein implicated in neuronal stress signaling upstream of cellular protein  
444 JNK (108). It has previously been found to be essential for HSV-1 reactivation following  
445 PI3-kinase inhibition (52), as well as neuronal hyper-excitability through forskolin (54).  
446 However, it has not, until now, been shown to be central to reactivation mediated by  
447 heat shock. Although heat shock has been used as a trigger for HSV-1 reactivation (91-  
448 98), the downstream molecular events following this stimulus are not well elucidated.  
449 Multiple studies have demonstrated that heat shock during reactivation leads to the up-  
450 regulation of heat shock proteins, although none of them knowingly relate to DLK.  
451 Following hyperthermia-induced reactivation *in vivo*, heat shock protein HSP60 and  
452 HSP40 have been demonstrated to be up-regulated (98). Components of the heat

453 shock response pathway have also been demonstrated to be up-regulated by  
454 LY294002 treatment in an *in vitro* system (51), including HSP70. In fact, in this same  
455 system, treatment with cultures of heat shock factor 1 (HSF-1) activator compound  
456 causes robust reactivation. Outside of the virological context, heat shock protein  
457 chaperone HSP90 has been shown to bind and maintain DLK stability *in vivo* and it is  
458 specifically required for DLK function following axon injury signaling (109). It is a  
459 possibility that heat shock in our system is enhancing the function of DLK. Therefore,  
460 multiple signals may converge on DLK, which is then able to activate JNK and protein  
461 histone phosphorylation and to promote lytic gene expression from the heterochromatin-  
462 associated viral genome for reactivation to occur. Indeed, synergy has been  
463 demonstrated to enhance DLK activity in neurons (110). This central role for DLK is  
464 especially important as it is largely a neuron-specific protein that regulates the response  
465 to multiple forms of stress (111) and is therefore a potential target for novel therapeutics  
466 that would prevent HSV-1 gene expression and ultimately reactivation.

467

## 468 **Methods**

### 469 Primary neuronal cultures

470 Sympathetic neurons from the superior cervical ganglia (SCG) of post-natal day 0–2  
471 (P0-P2) CD1 Mice (Charles River Laboratories) were dissected as previously described  
472 (52). Sensory neurons from the trigeminal ganglia (TG) or adult (P21-24) CD1 Mice  
473 (Charles River Laboratories) were dissected as previously described (112). Rodent  
474 handling and husbandry were carried out under animal protocols approved by the  
475 Animal Care and Use Committee of the University of Virginia (UVA). Ganglia were

476 briefly kept in Leibovitz's L-15 media with 2.05 mM L-Glutamine before dissociation in  
477 Collagenase Type IV (1 mg/mL) followed by Trypsin (2.5 mg/mL) for 20 min each at 37  
478 °C. Dissociated ganglia were triturated, and approximately 5,000 neurons per well were  
479 plated onto rat tail collagen in a 24-well plate. Sympathetic neurons were maintained in  
480 CM1 (Neurobasal Medium supplemented with PRIME-XV IS21 Neuronal Supplement  
481 (Irvine Scientific), 50 ng/mL Mouse NGF 2.5S, 2 mM L-Glutamine, and Primocin).  
482 Aphidicolin (3.3 mg/mL) was added to the CM1 for the first 5 days post-dissection to  
483 select against proliferating cells. Sensory neurons were maintained in the same media  
484 supplemented with GDNF (50 ng/ml; Peprotech 450-44), and more Aphidicolin (6.6  
485 mg/mL) was used for the first 5 days as more non-neuronal cells tend to be dissected  
486 with this neuron type.

487

#### 488 Establishment and reactivation of latent HSV-1 infection in primary neurons

489 Neonatal SCGs were infected at postnatal days 6-8 with either Us11-GFP, SCgHZ, or  
490 Stayput-GFP at an MOI of 7.5 PFU/cell assuming 5,000 cells/well in DPBS +CaCl<sub>2</sub>  
491 +MgCl<sub>2</sub> supplemented with 1% Fetal Bovine Serum, 4.5 g/L glucose, and either with or  
492 without 10 mM Acyclovir (ACV) for 3 hr at 37 °C. Post-infection, inoculum was  
493 replaced with CM1 containing with or without 50 mM. For infections with ACV, the ACV  
494 was washed out 5-6 days post-infection. Reactivation was carried out with LY294002 20  
495 μM, forskolin 60 μM (pulsed for 20 hours), and heat shock (3 hours at 43 °C) in  
496 BrainPhys (Stem Cell Technologies) supplemented with 2 mM L-Glutamine, 10% Fetal  
497 Bovine Serum, Mouse NGF 2.5S (50 ng/mL) and Primocin. Reactivation was quantified

498 by counting number of GFP-positive neurons or performing Reverse Transcription  
499 Quantitative PCR (RT-qPCR) for HSV-1 lytic transcripts.

500

501

## 502 **Acknowledgements**

503 We thank Dr. Ian Mohr at New York University for the gift of the Us11-GFP virus and the  
504 pSXZY-GFP-Us11 plasmid. We thank Gary Cohen at the University of Pennsylvania for  
505 SCgHZ and Vero F6 cells. This work was supported by National Institutes of Health  
506 grants NS105630 (ARC), T32GM008136 (SD), AI130618, AI147163 and AI151358  
507 (ACW), The Owens Family Foundation (ARC), and a German Centre for Infection  
508 Research (DZIF) Associate Professorship (DPD).

509

## 510 **Data Availability**

511 All nanopore sequencing datasets associated with this study are available via the  
512 European Nucleotide Archive under the accession PRJEB51869.

513



514 References

- 515 1. Richter ER, Dias JK, Gilbert JE, 2nd, Atherton SS. 2009. Distribution of herpes  
516 simplex virus type 1 and varicella zoster virus in ganglia of the human head and  
517 neck. *J Infect Dis* 200:1901-6.
- 518 2. Baringer JR, Pisani P. 1994. Herpes simplex virus genomes in human nervous  
519 system tissue analyzed by polymerase chain reaction. *Ann Neurol* 36:823-9.
- 520 3. Baringer JR, Swoveland P. 1973. Recovery of herpes-simplex virus from human  
521 trigeminal ganglions. *N Engl J Med* 288:648-50.
- 522 4. Warren KG, Brown SM, Wroblewska Z, Gilden D, Koprowski H, Subak-Sharpe J.  
523 1978. Isolation of latent herpes simplex virus from the superior cervical and  
524 vagus ganglions of human beings. *N Engl J Med* 298:1068-9.
- 525 5. Singh N, Tschärke DC. 2020. Herpes Simplex Virus Latency Is Noisier the Closer  
526 We Look. *J Virol* 94.
- 527 6. Bloom DC. 2016. Alpha herpesvirus Latency: A Dynamic State of Transcription  
528 and Reactivation. *Adv Virus Res* 94:53-80.
- 529 7. Speck PG, Simmons A. 1991. Divergent molecular pathways of productive and  
530 latent infection with a virulent strain of herpes simplex virus type 1. *J Virol*  
531 65:4001-5.
- 532 8. Speck PG, Simmons A. 1992. Synchronous appearance of antigen-positive and  
533 latently infected neurons in spinal ganglia of mice infected with a virulent strain of  
534 herpes simplex virus. *J Gen Virol* 73 ( Pt 5):1281-5.
- 535 9. Proenca JT, Nelson D, Nicoll MP, Connor V, Efstathiou S. 2016. Analyses of  
536 herpes simplex virus type 1 latency and reactivation at the single cell level using  
537 fluorescent reporter mice. *J Gen Virol* 97:767-777.
- 538 10. Maillet S, Naas T, Crepin S, Roque-Afonso AM, Lafay F, Efstathiou S, Labetoulle  
539 M. 2006. Herpes simplex virus type 1 latently infected neurons differentially  
540 express latency-associated and ICP0 transcripts. *J Virol* 80:9310-21.
- 541 11. Proenca JT, Coleman HM, Connor V, Winton DJ, Efstathiou S. 2008. A historical  
542 analysis of herpes simplex virus promoter activation in vivo reveals distinct  
543 populations of latently infected neurones. *J Gen Virol* 89:2965-2974.
- 544 12. Proenca JT, Coleman HM, Nicoll MP, Connor V, Preston CM, Arthur J, Efstathiou  
545 S. 2011. An investigation of herpes simplex virus promoter activity compatible  
546 with latency establishment reveals VP16-independent activation of immediate-  
547 early promoters in sensory neurones. *J Gen Virol* 92:2575-2585.
- 548 13. Chen SH, Kramer MF, Schaffer PA, Coen DM. 1997. A viral function represses  
549 accumulation of transcripts from productive-cycle genes in mouse ganglia latently  
550 infected with herpes simplex virus. *J Virol* 71:5878-84.
- 551 14. Tzeng NS, Chung CH, Lin FH, Chiang CP, Yeh CB, Huang SY, Lu RB, Chang  
552 HA, Kao YC, Yeh HW, Chiang WS, Chou YC, Tsao CH, Wu YF, Chien WC.  
553 2018. Anti-herpetic Medications and Reduced Risk of Dementia in Patients with  
554 Herpes Simplex Virus Infections-a Nationwide, Population-Based Cohort Study in  
555 Taiwan. *Neurotherapeutics* 15:417-429.
- 556 15. Letenneur L, Peres K, Fleury H, Garrigue I, Barberger-Gateau P, Helmer C,  
557 Orgogozo JM, Gauthier S, Dartigues JF. 2008. Seropositivity to herpes simplex

- 558 virus antibodies and risk of Alzheimer's disease: a population-based cohort  
559 study. *PLoS One* 3:e3637.
- 560 16. De Chiara G, Piacentini R, Fabiani M, Mastrodonato A, Marcocci ME, Limongi D,  
561 Napoletani G, Protto V, Coluccio P, Celestino I, Li Puma DD, Grassi C, Palamara  
562 AT. 2019. Recurrent herpes simplex virus-1 infection induces hallmarks of  
563 neurodegeneration and cognitive deficits in mice. *PLoS Pathog* 15:e1007617.
- 564 17. Itzhaki RF. 2014. Herpes simplex virus type 1 and Alzheimer's disease:  
565 increasing evidence for a major role of the virus. *Front Aging Neurosci* 6:202.
- 566 18. Itzhaki RF, Lin WR, Shang D, Wilcock GK, Faragher B, Jamieson GA. 1997.  
567 Herpes simplex virus type 1 in brain and risk of Alzheimer's disease. *Lancet*  
568 349:241-4.
- 569 19. Koelle DM, Magaret A, Warren T, Schellenberg GD, Wald A. 2010. APOE  
570 genotype is associated with oral herpetic lesions but not genital or oral herpes  
571 simplex virus shedding. *Sex Transm Infect* 86:202-6.
- 572 20. Steel AJ, Eslick GD. 2015. Herpes Viruses Increase the Risk of Alzheimer's  
573 Disease: A Meta-Analysis. *J Alzheimers Dis* 47:351-64.
- 574 21. Readhead B, Haure-Mirande JV, Funk CC, Richards MA, Shannon P,  
575 Haroutunian V, Sano M, Liang WS, Beckmann ND, Price ND, Reiman EM,  
576 Schadt EE, Ehrlich ME, Gandy S, Dudley JT. 2018. Multiscale Analysis of  
577 Independent Alzheimer's Cohorts Finds Disruption of Molecular, Genetic, and  
578 Clinical Networks by Human Herpesvirus. *Neuron* 99:64-82 e7.
- 579 22. Lopatko Lindman K, Hemmingsson ES, Weidung B, Brannstrom J, Josefsson M,  
580 Olsson J, Elgh F, Nordstrom P, Lovheim H. 2021. Herpesvirus infections,  
581 antiviral treatment, and the risk of dementia-a registry-based cohort study in  
582 Sweden. *Alzheimers Dement (N Y)* 7:e12119.
- 583 23. Honess RW, Roizman B. 1974. Regulation of herpesvirus macromolecular  
584 synthesis. I. Cascade regulation of the synthesis of three groups of viral proteins.  
585 *J Virol* 14:8-19.
- 586 24. Honess RW, Roizman B. 1975. Regulation of herpesvirus macromolecular  
587 synthesis: sequential transition of polypeptide synthesis requires functional viral  
588 polypeptides. *Proc Natl Acad Sci U S A* 72:1276-80.
- 589 25. Kim JY, Mandarino A, Chao MV, Mohr I, Wilson AC. 2012. Transient reversal of  
590 episome silencing precedes VP16-dependent transcription during reactivation of  
591 latent HSV-1 in neurons. *PLoS Pathog* 8:e1002540.
- 592 26. Lentine AF, Bachenheimer SL. 1990. Intracellular organization of herpes simplex  
593 virus type 1 DNA assayed by staphylococcal nuclease sensitivity. *Virus Res*  
594 16:275-92.
- 595 27. Leinbach SS, Summers WC. 1980. The structure of herpes simplex virus type 1  
596 DNA as probed by micrococcal nuclease digestion. *J Gen Virol* 51:45-59.
- 597 28. Pignatti PF, Cassai E. 1980. Analysis of herpes simplex virus nucleoprotein  
598 complexes extracted from infected cells. *J Virol* 36:816-28.
- 599 29. Conn KL, Hendzel MJ, Schang LM. 2008. Linker histones are mobilized during  
600 infection with herpes simplex virus type 1. *J Virol* 82:8629-46.
- 601 30. Conn KL, Hendzel MJ, Schang LM. 2011. Core histones H2B and H4 are  
602 mobilized during infection with herpes simplex virus 1. *J Virol* 85:13234-52.

- 603 31. Monier K, Armas JC, Etteldorf S, Ghazal P, Sullivan KF. 2000. Annexation of the  
604 interchromosomal space during viral infection. *Nat Cell Biol* 2:661-5.
- 605 32. Herrera FJ, Triezenberg SJ. 2004. VP16-dependent association of chromatin-  
606 modifying coactivators and underrepresentation of histones at immediate-early  
607 gene promoters during herpes simplex virus infection. *J Virol* 78:9689-96.
- 608 33. Kent JR, Zeng PY, Atanasiu D, Gardner J, Fraser NW, Berger SL. 2004. During  
609 lytic infection herpes simplex virus type 1 is associated with histones bearing  
610 modifications that correlate with active transcription. *J Virol* 78:10178-86.
- 611 34. Lacasse JJ, Schang LM. 2010. During lytic infections, herpes simplex virus type  
612 1 DNA is in complexes with the properties of unstable nucleosomes. *J Virol*  
613 84:1920-33.
- 614 35. Kutluay SB, Doroghazi J, Roemer ME, Triezenberg SJ. 2008. Curcumin inhibits  
615 herpes simplex virus immediate-early gene expression by a mechanism  
616 independent of p300/CBP histone acetyltransferase activity. *Virology* 373:239-47.
- 617 36. Kutluay SB, Triezenberg SJ. 2009. Regulation of histone deposition on the  
618 herpes simplex virus type 1 genome during lytic infection. *J Virol* 83:5835-45.
- 619 37. Oh J, Fraser NW. 2008. Temporal association of the herpes simplex virus  
620 genome with histone proteins during a lytic infection. *J Virol* 82:3530-7.
- 621 38. Cliffe AR, Knipe DM. 2008. Herpes simplex virus ICP0 promotes both histone  
622 removal and acetylation on viral DNA during lytic infection. *J Virol* 82:12030-8.
- 623 39. Fan D, Wang M, Cheng A, Jia R, Yang Q, Wu Y, Zhu D, Zhao X, Chen S, Liu M,  
624 Zhang S, Ou X, Mao S, Gao Q, Sun D, Wen X, Liu Y, Yu Y, Zhang L, Tian B,  
625 Pan L, Chen X. 2020. The Role of VP16 in the Life Cycle of Alphaherpesviruses.  
626 *Front Microbiol* 11:1910.
- 627 40. Liang Y, Vogel JL, Arbuckle JH, Rai G, Jadhav A, Simeonov A, Maloney DJ,  
628 Kristie TM. 2013. Targeting the JMJD2 histone demethylases to epigenetically  
629 control herpesvirus infection and reactivation from latency. *Sci Transl Med*  
630 5:167ra5.
- 631 41. Liang Y, Vogel JL, Narayanan A, Peng H, Kristie TM. 2009. Inhibition of the  
632 histone demethylase LSD1 blocks alpha-herpesvirus lytic replication and  
633 reactivation from latency. *Nat Med* 15:1312-7.
- 634 42. Narayanan A, Ruyechan WT, Kristie TM. 2007. The coactivator host cell factor-1  
635 mediates Set1 and MLL1 H3K4 trimethylation at herpesvirus immediate early  
636 promoters for initiation of infection. *Proc Natl Acad Sci U S A* 104:10835-40.
- 637 43. Wysocka J, Myers MP, Laherty CD, Eisenman RN, Herr W. 2003. Human Sin3  
638 deacetylase and trithorax-related Set1/Ash2 histone H3-K4 methyltransferase  
639 are tethered together selectively by the cell-proliferation factor HCF-1. *Genes*  
640 *Dev* 17:896-911.
- 641 44. Dremel SE, DeLuca NA. 2019. Herpes simplex viral nucleoprotein creates a  
642 competitive transcriptional environment facilitating robust viral transcription and  
643 host shut off. *Elife* 8.
- 644 45. Wang QY, Zhou C, Johnson KE, Colgrove RC, Coen DM, Knipe DM. 2005.  
645 Herpesviral latency-associated transcript gene promotes assembly of  
646 heterochromatin on viral lytic-gene promoters in latent infection. *Proc Natl Acad*  
647 *Sci U S A* 102:16055-9.

- 648 46. Cliffe AR, Coen DM, Knipe DM. 2013. Kinetics of facultative heterochromatin and  
649 polycomb group protein association with the herpes simplex viral genome during  
650 establishment of latent infection. *mBio* 4.
- 651 47. Cliffe AR, Garber DA, Knipe DM. 2009. Transcription of the herpes simplex virus  
652 latency-associated transcript promotes the formation of facultative  
653 heterochromatin on lytic promoters. *J Virol* 83:8182-90.
- 654 48. Knipe DM, Cliffe A. 2008. Chromatin control of herpes simplex virus lytic and  
655 latent infection. *Nat Rev Microbiol* 6:211-21.
- 656 49. Kwiatkowski DL, Thompson HW, Bloom DC. 2009. The polycomb group protein  
657 Bmi1 binds to the herpes simplex virus 1 latent genome and maintains repressive  
658 histone marks during latency. *J Virol* 83:8173-81.
- 659 50. Dochnal SA, Francois AK, Cliffe AR. 2021. De Novo Polycomb Recruitment:  
660 Lessons from Latent Herpesviruses. *Viruses* 13.
- 661 51. Hu HL, Srinivas KP, Wang S, Chao MV, Lionnet T, Mohr I, Wilson AC, Depledge  
662 DP, Huang TT. 2022. Single-cell transcriptomics identifies Gadd45b as a  
663 regulator of herpesvirus-reactivating neurons. *EMBO Rep* 23:e53543.
- 664 52. Cliffe AR, Arbuckle JH, Vogel JL, Geden MJ, Rothbart SB, Cusack CL, Strahl  
665 BD, Kristie TM, Deshmukh M. 2015. Neuronal Stress Pathway Mediating a  
666 Histone Methyl/Phospho Switch Is Required for Herpes Simplex Virus  
667 Reactivation. *Cell Host Microbe* 18:649-58.
- 668 53. Cliffe AR, Wilson AC. 2017. Restarting Lytic Gene Transcription at the Onset of  
669 Herpes Simplex Virus Reactivation. *J Virol* 91.
- 670 54. Cuddy SR, Schinlever AR, Dochnal S, Seegren PV, Suzich J, Kundu P, Downs  
671 TK, Farah M, Desai BN, Boutell C, Cliffe AR. 2020. Neuronal hyperexcitability is  
672 a DLK-dependent trigger of herpes simplex virus reactivation that can be induced  
673 by IL-1. *Elife* 9.
- 674 55. Steiner I, Spivack JG, Deshmane SL, Ace CI, Preston CM, Fraser NW. 1990. A  
675 herpes simplex virus type 1 mutant containing a nontransducing Vmw65 protein  
676 establishes latent infection in vivo in the absence of viral replication and  
677 reactivates efficiently from explanted trigeminal ganglia. *J Virol* 64:1630-8.
- 678 56. Wilson AC, Mohr I. 2012. A cultured affair: HSV latency and reactivation in  
679 neurons. *Trends Microbiol* 20:604-11.
- 680 57. Lachmann R. 2003. Herpes simplex virus latency. *Expert Rev Mol Med* 5:1-14.
- 681 58. Pourchet A, Modrek AS, Placantonakis DG, Mohr I, Wilson AC. 2017. Modeling  
682 HSV-1 Latency in Human Embryonic Stem Cell-Derived Neurons. *Pathogens* 6.
- 683 59. Suzich JB, Cliffe AR. 2018. Strength in diversity: Understanding the pathways to  
684 herpes simplex virus reactivation. *Virology* 522:81-91.
- 685 60. Suzich JB, Cuddy SR, Baidas H, Dochnal S, Ke E, Schinlever AR, Babnis A,  
686 Boutell C, Cliffe AR. 2021. PML-NB-dependent type I interferon memory results  
687 in a restricted form of HSV latency. *EMBO Rep* 22:e52547.
- 688 61. Linderman JA, Kobayashi M, Rayannavar V, Fak JJ, Darnell RB, Chao MV,  
689 Wilson AC, Mohr I. 2017. Immune Escape via a Transient Gene Expression  
690 Program Enables Productive Replication of a Latent Pathogen. *Cell Rep*  
691 18:1312-1323.



- 692 62. Bertke AS, Swanson SM, Chen J, Imai Y, Kinchington PR, Margolis TP. 2011.  
693 A5-positive primary sensory neurons are nonpermissive for productive infection  
694 with herpes simplex virus 1 in vitro. *J Virol* 85:6669-77.
- 695 63. Cabrera JR, Charron AJ, Leib DA. 2018. Neuronal Subtype Determines Herpes  
696 Simplex Virus 1 Latency-Associated-Transcript Promoter Activity during Latency.  
697 *J Virol* 92.
- 698 64. Arthur JL, Scarpini CG, Connor V, Lachmann RH, Tolkovsky AM, Efstathiou S.  
699 2001. Herpes simplex virus type 1 promoter activity during latency establishment,  
700 maintenance, and reactivation in primary dorsal root neurons in vitro. *J Virol*  
701 75:3885-95.
- 702 65. Camarena V, Kobayashi M, Kim JY, Roehm P, Perez R, Gardner J, Wilson AC,  
703 Mohr I, Chao MV. 2010. Nature and duration of growth factor signaling through  
704 receptor tyrosine kinases regulates HSV-1 latency in neurons. *Cell Host Microbe*  
705 8:320-30.
- 706 66. Yanez AA, Harrell T, Sriranganathan HJ, Ives AM, Bertke AS. 2017.  
707 Neurotrophic Factors NGF, GDNF and NTN Selectively Modulate HSV1 and  
708 HSV2 Lytic Infection and Reactivation in Primary Adult Sensory and Autonomic  
709 Neurons. *Pathogens* 6.
- 710 67. Wilcox CL, Johnson EM, Jr. 1988. Characterization of nerve growth factor-  
711 dependent herpes simplex virus latency in neurons in vitro. *J Virol* 62:393-9.
- 712 68. Wilcox CL, Smith RL, Freed CR, Johnson EM, Jr. 1990. Nerve growth factor-  
713 dependence of herpes simplex virus latency in peripheral sympathetic and  
714 sensory neurons in vitro. *J Neurosci* 10:1268-75.
- 715 69. Thellman NM, Botting C, Madaj Z, Triezenberg SJ. 2017. An Immortalized  
716 Human Dorsal Root Ganglion Cell Line Provides a Novel Context To Study  
717 Herpes Simplex Virus 1 Latency and Reactivation. *J Virol* 91.
- 718 70. Edwards TG, Bloom DC. 2019. Lund Human Mesencephalic (LUHMES)  
719 Neuronal Cell Line Supports Herpes Simplex Virus 1 Latency In Vitro. *J Virol* 93.
- 720 71. De Clercq E. 2008. The discovery of antiviral agents: ten different compounds,  
721 ten different stories. *Med Res Rev* 28:929-53.
- 722 72. De Clercq E, Holy A. 2005. Acyclic nucleoside phosphonates: a key class of  
723 antiviral drugs. *Nat Rev Drug Discov* 4:928-40.
- 724 73. Morfin F, Thouvenot D. 2003. Herpes simplex virus resistance to antiviral drugs.  
725 *J Clin Virol* 26:29-37.
- 726 74. Benboudjema L, Mulvey M, Gao Y, Pimplikar SW, Mohr I. 2003. Association of  
727 the herpes simplex virus type 1 Us11 gene product with the cellular kinesin light-  
728 chain-related protein PAT1 results in the redistribution of both polypeptides. *J*  
729 *Virol* 77:9192-203.
- 730 75. Forrester A, Farrell H, Wilkinson G, Kaye J, Davis-Poynter N, Minson T. 1992.  
731 Construction and properties of a mutant of herpes simplex virus type 1 with  
732 glycoprotein H coding sequences deleted. *J Virol* 66:341-8.
- 733 76. Hilterbrand AT, Heldwein EE. 2019. Go go gadget glycoprotein!: HSV-1 draws on  
734 its sizeable glycoprotein tool kit to customize its diverse entry routes. *PLoS*  
735 *Pathog* 15:e1007660.

- 736 77. Turner A, Bruun B, Minson T, Browne H. 1998. Glycoproteins gB, gD, and gHgL  
737 of herpes simplex virus type 1 are necessary and sufficient to mediate membrane  
738 fusion in a Cos cell transfection system. *J Virol* 72:873-5.
- 739 78. Hu HL, Shiflett LA, Kobayashi M, Chao MV, Wilson AC, Mohr I, Huang TT. 2019.  
740 TOP2beta-Dependent Nuclear DNA Damage Shapes Extracellular Growth  
741 Factor Responses via Dynamic AKT Phosphorylation to Control Virus Latency.  
742 *Mol Cell* 74:466-480 e4.
- 743 79. Kobayashi M, Kim JY, Camarena V, Roehm PC, Chao MV, Wilson AC, Mohr I.  
744 2012. A primary neuron culture system for the study of herpes simplex virus  
745 latency and reactivation. *J Vis Exp* doi:10.3791/3823.
- 746 80. Chao MV. 2003. Neurotrophins and their receptors: a convergence point for  
747 many signalling pathways. *Nat Rev Neurosci* 4:299-309.
- 748 81. van Zeijl M, Fairhurst J, Jones TR, Vernon SK, Morin J, LaRocque J, Feld B,  
749 O'Hara B, Bloom JD, Johann SV. 2000. Novel class of thiourea compounds that  
750 inhibit herpes simplex virus type 1 DNA cleavage and encapsidation: resistance  
751 maps to the UL6 gene. *J Virol* 74:9054-61.
- 752 82. Newcomb WW, Brown JC. 2002. Inhibition of herpes simplex virus replication by  
753 WAY-150138: assembly of capsids depleted of the portal and terminase proteins  
754 involved in DNA encapsidation. *J Virol* 76:10084-8.
- 755 83. Pesola JM, Zhu J, Knipe DM, Coen DM. 2005. Herpes simplex virus 1  
756 immediate-early and early gene expression during reactivation from latency  
757 under conditions that prevent infectious virus production. *J Virol* 79:14516-25.
- 758 84. Hollville E, Romero SE, Deshmukh M. 2019. Apoptotic cell death regulation in  
759 neurons. *FEBS J* 286:3276-3298.
- 760 85. Annis RP, Swahari V, Nakamura A, Xie AX, Hammond SM, Deshmukh M. 2016.  
761 Mature neurons dynamically restrict apoptosis via redundant premitochondrial  
762 brakes. *FEBS J* 283:4569-4582.
- 763 86. Kole AJ, Swahari V, Hammond SM, Deshmukh M. 2011. miR-29b is activated  
764 during neuronal maturation and targets BH3-only genes to restrict apoptosis.  
765 *Genes Dev* 25:125-30.
- 766 87. Smith RL, Pizer LI, Johnson EM, Jr., Wilcox CL. 1992. Activation of second-  
767 messenger pathways reactivates latent herpes simplex virus in neuronal cultures.  
768 *Virology* 188:311-8.
- 769 88. Colgin MA, Smith RL, Wilcox CL. 2001. Inducible cyclic AMP early repressor  
770 produces reactivation of latent herpes simplex virus type 1 in neurons in vitro. *J*  
771 *Virol* 75:2912-20.
- 772 89. De Regge N, Van Opdenbosch N, Nauwynck HJ, Efstathiou S, Favoreel HW.  
773 2010. Interferon alpha induces establishment of alphaherpesvirus latency in  
774 sensory neurons in vitro. *PLoS One* 5.
- 775 90. Danaher RJ, Jacob RJ, Miller CS. 2003. Herpesvirus quiescence in neuronal  
776 cells. V: forskolin-responsiveness of the herpes simplex virus type 1 alpha0  
777 promoter and contribution of the putative cAMP response element. *J Neurovirol*  
778 9:489-97.
- 779 91. Moriya A, Yoshiki A, Kita M, Fushiki S, Imanishi J. 1994. Heat shock-induced  
780 reactivation of herpes simplex virus type 1 in latently infected mouse trigeminal  
781 ganglion cells in dissociated culture. *Arch Virol* 135:419-25.

- 782 92. Halford WP, Gebhardt BM, Carr DJ. 1996. Mechanisms of herpes simplex virus  
783 type 1 reactivation. *J Virol* 70:5051-60.
- 784 93. Halford WP, Schaffer PA. 2001. ICP0 is required for efficient reactivation of  
785 herpes simplex virus type 1 from neuronal latency. *J Virol* 75:3240-9.
- 786 94. Kushnir AS, Davido DJ, Schaffer PA. 2010. Role of nuclear factor Y in stress-  
787 induced activation of the herpes simplex virus type 1 ICP0 promoter. *J Virol*  
788 84:188-200.
- 789 95. Sawtell NM, Thompson RL. 1992. Rapid in vivo reactivation of herpes simplex  
790 virus in latently infected murine ganglionic neurons after transient hyperthermia. *J*  
791 *Virol* 66:2150-6.
- 792 96. Perng GC, Osorio N, Jiang X, Geertsema R, Hsiang C, Brown D, BenMohamed  
793 L, Wechsler SL. 2016. Large Amounts of Reactivated Virus in Tears Precedes  
794 Recurrent Herpes Stromal Keratitis in Stressed Rabbits Latently Infected with  
795 Herpes Simplex Virus. *Curr Eye Res* 41:284-91.
- 796 97. Shimomura Y, Higaki S, Watanabe K. 2010. Suppression of herpes simplex virus  
797 1 reactivation in a mouse eye model by cyclooxygenase inhibitor, heat shock  
798 protein inhibitor, and adenosine monophosphate. *Jpn J Ophthalmol* 54:187-90.
- 799 98. Hill JM, Lukiw WJ, Gebhardt BM, Higaki S, Loutsch JM, Myles ME, Thompson  
800 HW, Kwon BS, Bazan NG, Kaufman HE. 2001. Gene expression analyzed by  
801 microarrays in HSV-1 latent mouse trigeminal ganglion following heat stress.  
802 *Virus Genes* 23:273-80.
- 803 99. Sawtell NM, Thompson RL. 2004. Comparison of herpes simplex virus  
804 reactivation in ganglia in vivo and in explants demonstrates quantitative and  
805 qualitative differences. *J Virol* 78:7784-94.
- 806 100. Thompson RL, Preston CM, Sawtell NM. 2009. De novo synthesis of VP16  
807 coordinates the exit from HSV latency in vivo. *PLoS Pathog* 5:e1000352.
- 808 101. Patel S, Cohen F, Dean BJ, De La Torre K, Deshmukh G, Estrada AA, Ghosh  
809 AS, Gibbons P, Gustafson A, Huestis MP, Le Pichon CE, Lin H, Liu W, Liu X, Liu  
810 Y, Ly CQ, Lyssikatos JP, Ma C, Scearce-Levie K, Shin YG, Solanoy H, Stark KL,  
811 Wang J, Wang B, Zhao X, Lewcock JW, Siu M. 2015. Discovery of dual leucine  
812 zipper kinase (DLK, MAP3K12) inhibitors with activity in neurodegeneration  
813 models. *J Med Chem* 58:401-18.
- 814 102. Heinemann B, Nielsen JM, Hudlebusch HR, Lees MJ, Larsen DV, Boesen T,  
815 Labelle M, Gerlach LO, Birk P, Helin K. 2014. Inhibition of demethylases by GSK-  
816 J1/J4. *Nature* 514:E1-2.
- 817 103. Sawtell NM, Thompson RL. 2016. Herpes simplex virus and the lexicon of  
818 latency and reactivation: a call for defining terms and building an integrated  
819 collective framework. *F1000Res* 5.
- 820 104. Wang L, Brown JL, Cao R, Zhang Y, Kassis JA, Jones RS. 2004. Hierarchical  
821 recruitment of polycomb group silencing complexes. *Mol Cell* 14:637-46.
- 822 105. Chadwick BP, Willard HF. 2003. Barring gene expression after XIST: maintaining  
823 facultative heterochromatin on the inactive X. *Semin Cell Dev Biol* 14:359-67.
- 824 106. Du T, Zhou G, Roizman B. 2011. HSV-1 gene expression from reactivated  
825 ganglia is disordered and concurrent with suppression of latency-associated  
826 transcript and miRNAs. *Proc Natl Acad Sci U S A* 108:18820-4.

- 827 107. Whitford AL, Clinton CA, Lane Kennedy EB, Dochnal SA, Suzich JB, Cliffe AR.  
828 2022. Herpes Simplex Virus Reactivation Induced *Ex Vivo* Involves a  
829 DLK-Dependent but Histone Demethylase-Independent Wave of Lytic Gene  
830 Expression. bioRxiv doi:10.1101/2022.02.25.481951:2022.02.25.481951.  
831 108. Tedeschi A, Bradke F. 2013. The DLK signalling pathway--a double-edged sword  
832 in neural development and regeneration. EMBO Rep 14:605-14.  
833 109. Karney-Grobe S, Russo A, Frey E, Milbrandt J, DiAntonio A. 2018. HSP90 is a  
834 chaperone for DLK and is required for axon injury signaling. Proc Natl Acad Sci U  
835 S A 115:E9899-E9908.  
836 110. Summers DW, Frey E, Walker LJ, Milbrandt J, DiAntonio A. 2020. DLK Activation  
837 Synergizes with Mitochondrial Dysfunction to Downregulate Axon Survival  
838 Factors and Promote SARM1-Dependent Axon Degeneration. Mol Neurobiol  
839 57:1146-1158.  
840 111. Hirai S, Kawaguchi A, Suenaga J, Ono M, Cui DF, Ohno S. 2005. Expression of  
841 MUK/DLK/ZPK, an activator of the JNK pathway, in the nervous systems of the  
842 developing mouse embryo. Gene Expr Patterns 5:517-23.  
843 112. Malin SA, Davis BM, Molliver DC. 2007. Production of dissociated sensory  
844 neuron cultures and considerations for their use in studying neuronal function  
845 and plasticity. Nat Protoc 2:152-60.  
846

847



848 **Figure legends**

849 FIG 1: Stayput-GFP replicates as wild-type but is unable to spread.

850 (A) Schematic overview of HSV-1 strain SC16, the gH-deletion mutant SCgHZ, and  
851 Stayput-GFP. The gH deletion / LacZ insertion and Us11-GFP insertion sites are shown  
852 by blue and green triangles, respectively. (B-C) Coverage plots derived from (B)  
853 nanopore gDNA sequencing and (C) nanopore direct RNA sequencing of SCgHZ and  
854 Stayput-GFP. Sequence read data were aligned against the SC16 reference genome  
855 and demonstrate a drop in coverage at the gH locus. (D) Vero-F6 cells were infected  
856 with Stayput-GFP, SCgHZ, or Us11-GFP at an MOI of 5. Infectious virus was collected  
857 over time and titrated on Vero-F6 cells (n=3 biological replicates). (E-F) Neonatal  
858 sympathetic neurons were infected at an MOI of 0.5 PFU/cell with Stayput-GFP or  
859 Us11-GFP in the absence of DNA replication inhibitors. Us11-GFP-positive neurons  
860 were counted over time (n=3 biological replicates). Shapiro-Wilk normality test.  
861 Unpaired student's t test between Us11-GFP and Stayput-GFP. \*\*\*\*p<0.0001. The  
862 means and SEMs are shown.

863

864 FIG 2: Stayput-GFP in a latency and reactivation model using ACV to promote latency

865 establishment

866 (A) The latency and reactivation model scheme. Neonatal sympathetic neurons were  
867 infected with Stayput-GFP, parent virus SCgHZ, or wild-type Us11-GFP at an MOI of  
868 7.5 PFU/cell in the presence of ACV (50  $\mu$ M). 6 days later, ACV was removed, and 2  
869 days later, cultures were reactivated with LY294002 (20  $\mu$ M). The numbers of GFP  
870 positive neurons in a single well (containing approximately 5,000 neurons) for Stayput-

871 GFP and wild-type Us11-GFP were counted over time (B). Viral gene expression also  
872 was quantified by RT-qPCR for immediate early (*ICP27*), early (*ICP8*), and late (*gC*)  
873 genes at 20 hours (C), 48 hours (D), and 72 hours (E) post-stimulus. Relative  
874 expression to un-reactivated samples and cellular control (mGAPDH). n=6 biological  
875 replicates from 3 litters. Normality determined by Kolmogorov-Smirnov test (B-E). Mann-  
876 Whitney (B) or Kruskal-Wallis with comparison of means (C-E). \*p<0.05, \*\*p<0.01,  
877 \*\*\*p<0.001. The means and SEMs are represented. Individual biological replicates are  
878 indicating in C-E.

879

880 FIG 3: Stayput-GFP can be used to create a quiescence model in the absence of viral  
881 DNA replication inhibitors in neonatal sympathetic neurons

882 Neonatal sympathetic neurons were infected with Stayput-GFP at an MOI of 7.5  
883 PFU/cell and the numbers of Us11-GFP-positive neurons were quantified. n=9  
884 biological replicates from 3 litters (A). SYTOX<sup>TM</sup> Orange-positive neurons were also  
885 quantified over time (n=3) (B). Following infection, the same field of view was imaged to  
886 track GFP and SYTOX<sup>TM</sup> Orange (250  $\mu$ m scale bar for FOV, 25  $\mu$ m scale bar for zoom)  
887 over time (C). Lytic (D-F) and latent (G) viral transcripts (n=6) were quantified up to 40  
888 days post-infection. Viral DNA load (n=6) (H) was also quantified up to 40 days post-  
889 infection. Individual biological replicates along with the means and SEMs are shown.

890

891 FIG 4: Reactivation decreases with length of time infected

892 Sympathetic neurons were infected with Stayput-GFP at an MOI of 7.5 PFU/cell and  
893 were treated with LY294002 when GFP-positive neurons were no longer detected

894 (approximately 30 days post-infection). GFP-positive neurons were quantified over time;  
895 peak GFP (48 hours post-stimulus) is represented (A). Neonatal SCGs were infected at  
896 age postnatal day 8 (P8) with Stayput-GFP in the presence of ACV. ACV was removed  
897 6 days post-infection and reactivation was triggered at the indicated times post-infection  
898 (B). Neonatal SCGs were infected as above after different lengths of time *in vitro*,  
899 representing indicated postnatal ages, and reactivated 8 days post-infection with  
900 LY294002 (C). n=12 biological replicates from 3 litters. Normality determined by  
901 Kolmogorov-Smirnov test. Unpaired student's t-test (B) or Mann-Whitney (A, C) based  
902 on normality of data. \*\*p<0.01, \*\*\*p<0.001, \*\*\*\*p<0.0001. Individual biological replicates  
903 along with the means and SEMs are shown.

904

905 FIG 5: Viral gene expression can be restarted following latency establishment

906 Neonatal sympathetic neurons or adult sensory neurons were infected at an MOI of 7.5  
907 PFU/cell with Stayput-GFP in the absence of viral DNA replication inhibitors. Following  
908 the loss of GFP, signaling quiescence of the culture, wells were reactivated with a  
909 variety of triggers, including combinations of LY-294002 (20  $\mu$ M), forskolin (60  $\mu$ M), and  
910 heat shock (43°C for 3 hours), as well as a superinfection with untagged F strain at an  
911 MOI of 10 PFU/cell. GFP was quantified over time, and the peak GFP, at 48 hours post-  
912 stimulus, is depicted. N=12 biological replicates (A, E). Immediate early (B, F), early (C,  
913 G) and late (D, H) viral transcripts were investigated over time following the stimulus.  
914 Neonatal sympathetic neurons n=9 biological replicates from 3 litters. Mann-Whitney  
915 against 0 hours (A-D). Adult sensory neurons n=9 biological replicates (E) or n=6  
916 replicates (F, G, H). Normality determined by Kolmogorov-Smirnov test. Mann-Whitney

917 against 0 hours. \* $p < 0.05$ , \*\* $p < 0.01$ , \*\*\* $p < 0.001$ , \*\*\*\* $p < 0.0001$ . Individual biological  
918 replicates along with the means and SEMs are shown.

919

920 FIG 6: Reactivation is dependent on DLK

921 Cultures were infected with Stayput-GFP at an MOI of 7.5 PFU/cell in the absence of  
922 ACV. Following loss of GFP, cultures were reactivated with a combination of LY294002,  
923 forskolin, and heat shock in the presence of DLK inhibitor GNE-3511 (4  $\mu$ M). Immediate  
924 early (*ICP27*) and early (*ICP8/UL30*) viral genes (A-C) were investigated at 12.5 hours-  
925 post stimulus, and GFP was counted over time (D). Peak GFP, consistently around 48  
926 hours post-stimulus, is presented.  $n=9$  biological replicates from 3 litters. Normality  
927 determined by Kolmogorov-Smirnov. Mann-Whitney test. (\* $p < 0.05$ , \*\* $p < 0.01$ ,  
928 \*\*\* $p < 0.001$ , \*\*\*\* $p < 0.0001$ ). The mean and SEM are shown.

929

930 Figure 7: The early phase of lytic gene expression following a reactivation stimulus is  
931 independent of demethylase activity.

932 Cultures were infected with Stayput-GFP at an MOI of 7.5 PFU/cell. Following loss of  
933 GFP, cultures were reactivated with a combination of LY-294002, forskolin, and heat  
934 shock in the presence of H3K27 demethylase inhibitor GSK-J4 (2  $\mu$ M) or H3K9  
935 demethylase inhibitor OG-L002 (20  $\mu$ M). Immediate early (*ICP27*) and early  
936 (*ICP8/UL30*) viral genes (A-C) were investigated at 12.5 hours-post stimulus and GFP  
937 was counted over time (D). Peak GFP is presented.  $n=3$  biological replicates from 3  
938 litters. Normality determined by Kolmogorov-Smirnov. Mann-Whitney. \* $p < 0.05$ ,  
939 \*\* $p < 0.01$ , \*\*\* $p < 0.001$ , \*\*\*\* $p < 0.0001$ . The mean and SEM are shown.

940

941 Figure 8: Differential dependence on viral DNA replication between Phase I and II

942 reactivation.

943 Cultures were infected with Stayput-GFP at an MOI of 7.5 PFU/cell in the absence of

944 ACV. Following loss of GFP, cultures were reactivated with a combination of LY-

945 294002, forskolin, and heat shock in the presence of ACV (50  $\mu$ M). Late (*VP16*, *gC*,

946 *UL10*) genes (A-C) were investigated at 22 hours-post stimuli. GFP was counted over

947 time and peak GFP is presented (D). n=12 biological replicates, normality determined

948 by Kolmogorov-Smirnov. Mann-Whitney. \*p<0.05, \*\*p<0.01, \*\*\*p<0.001, \*\*\*\*p<0.0001.

949 The mean and SEM are shown.

950

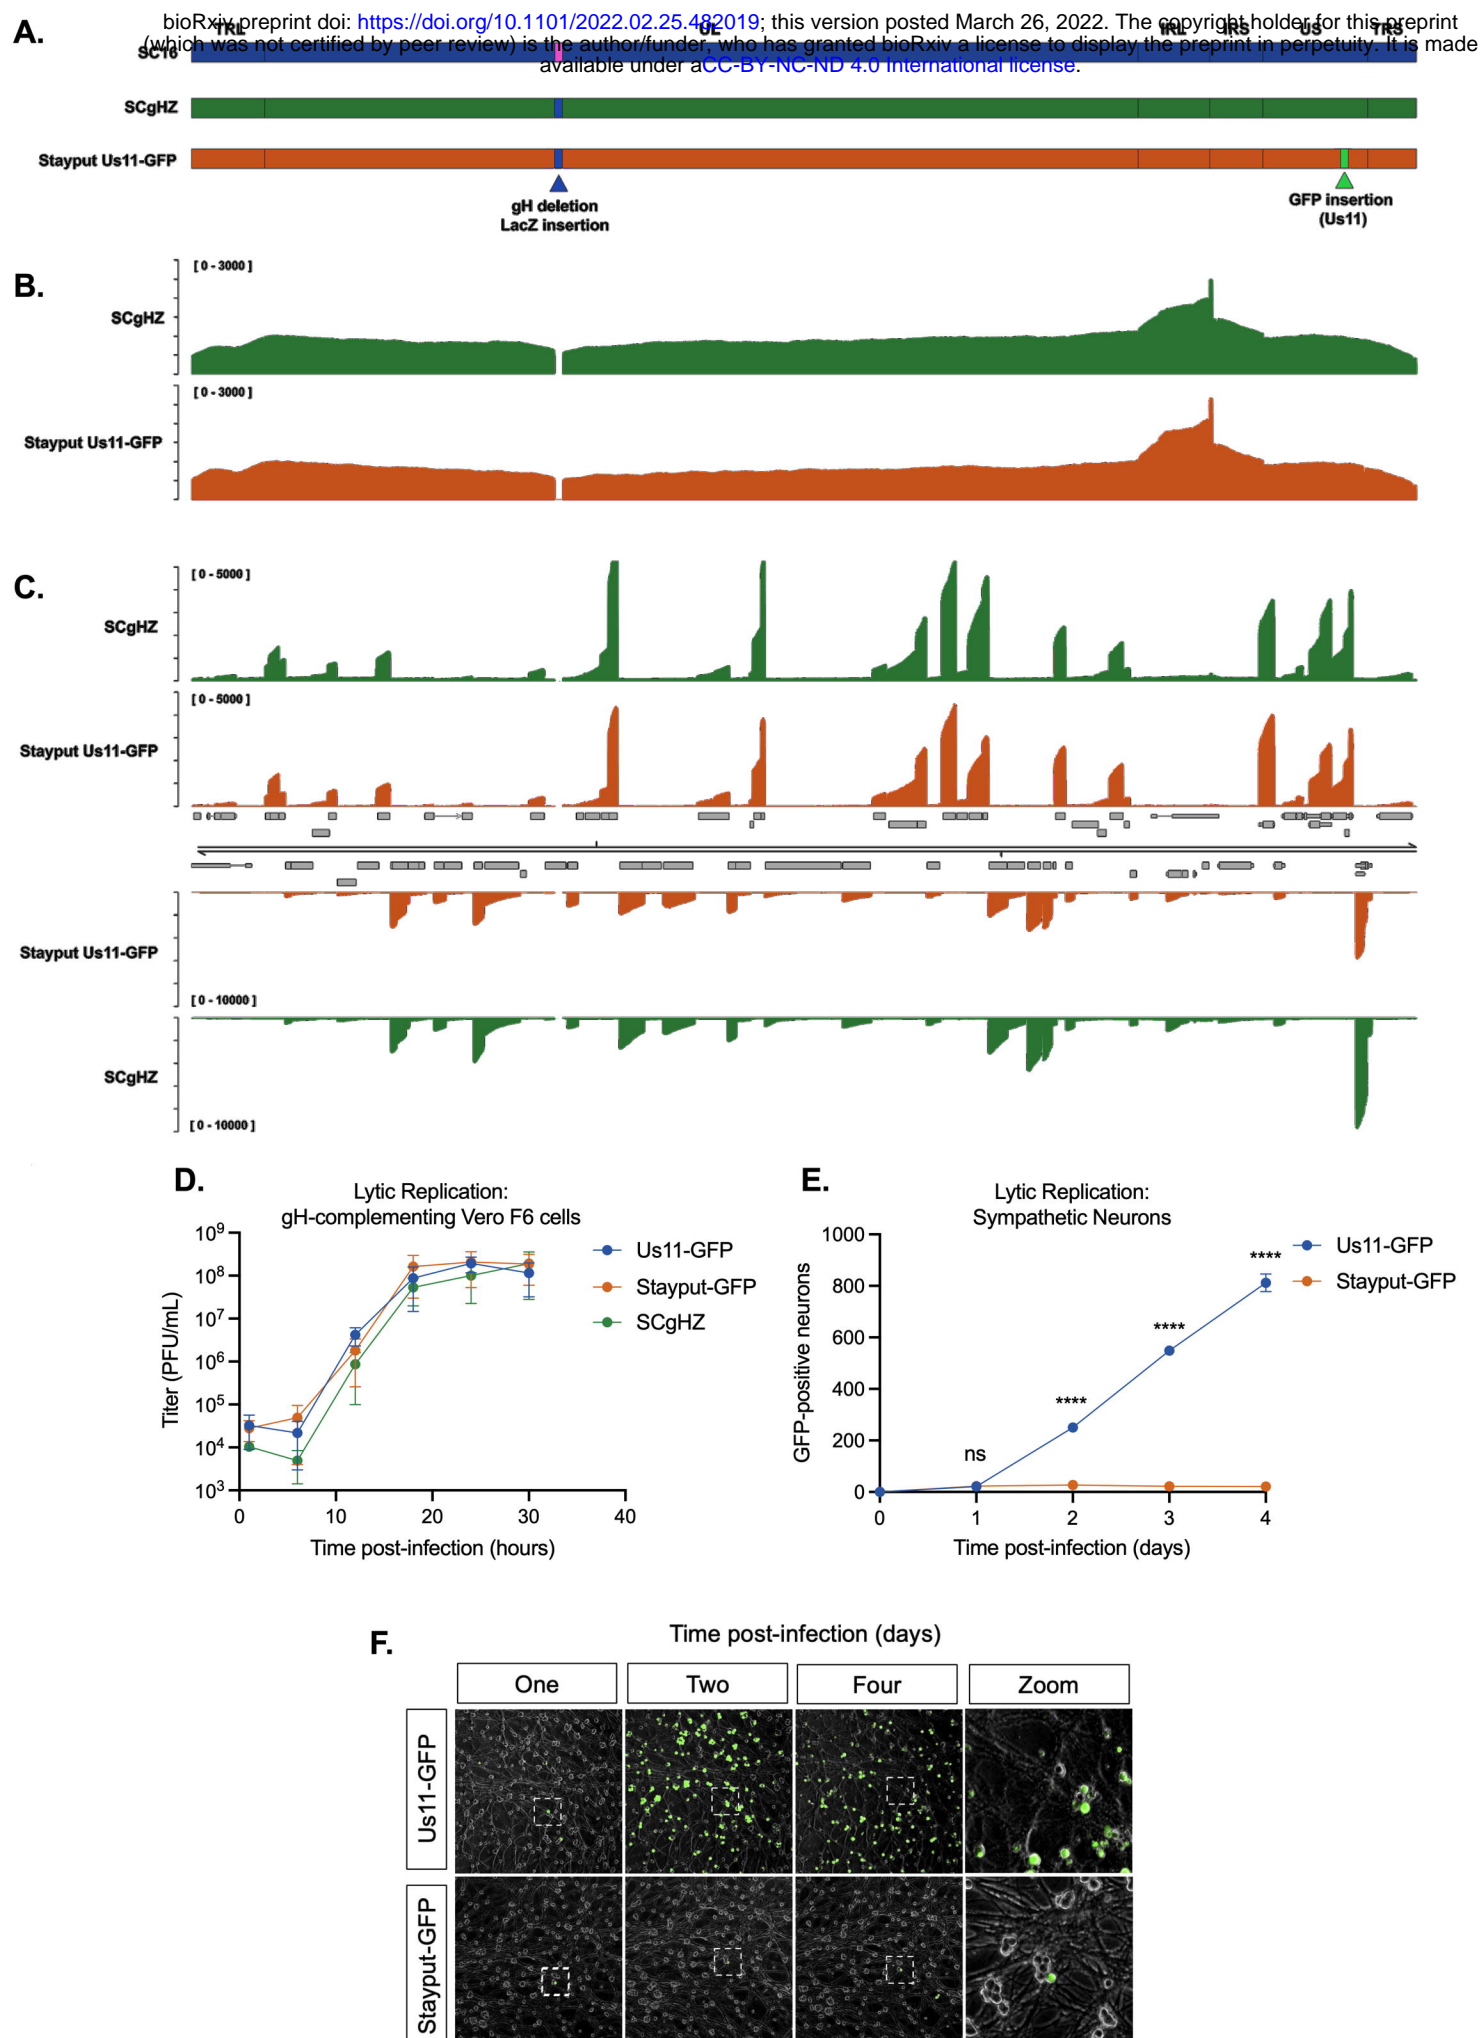

Figure 1

**A.**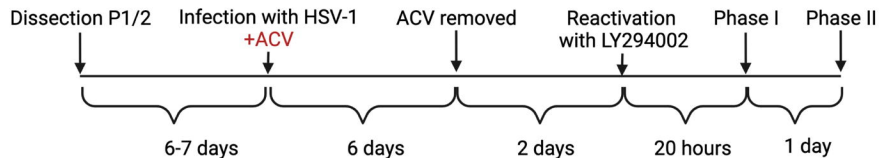**B.**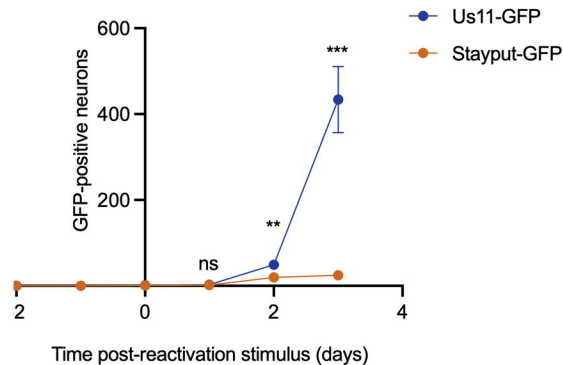**C.**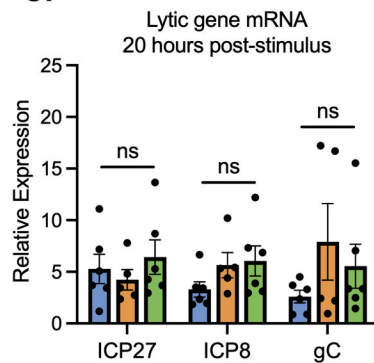**D.**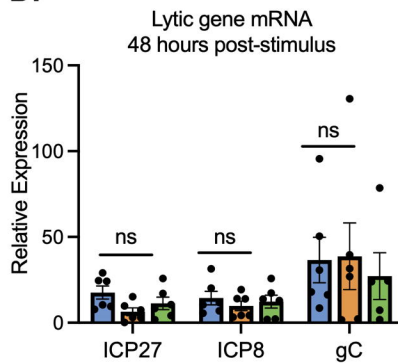**E.**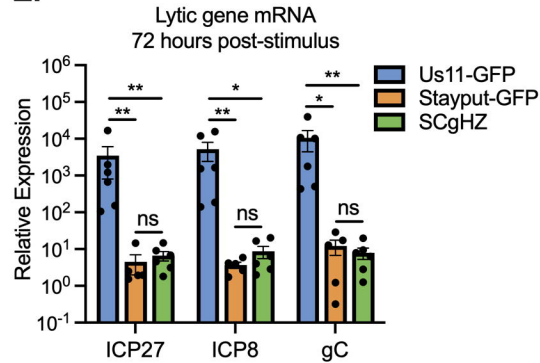

Figure 2



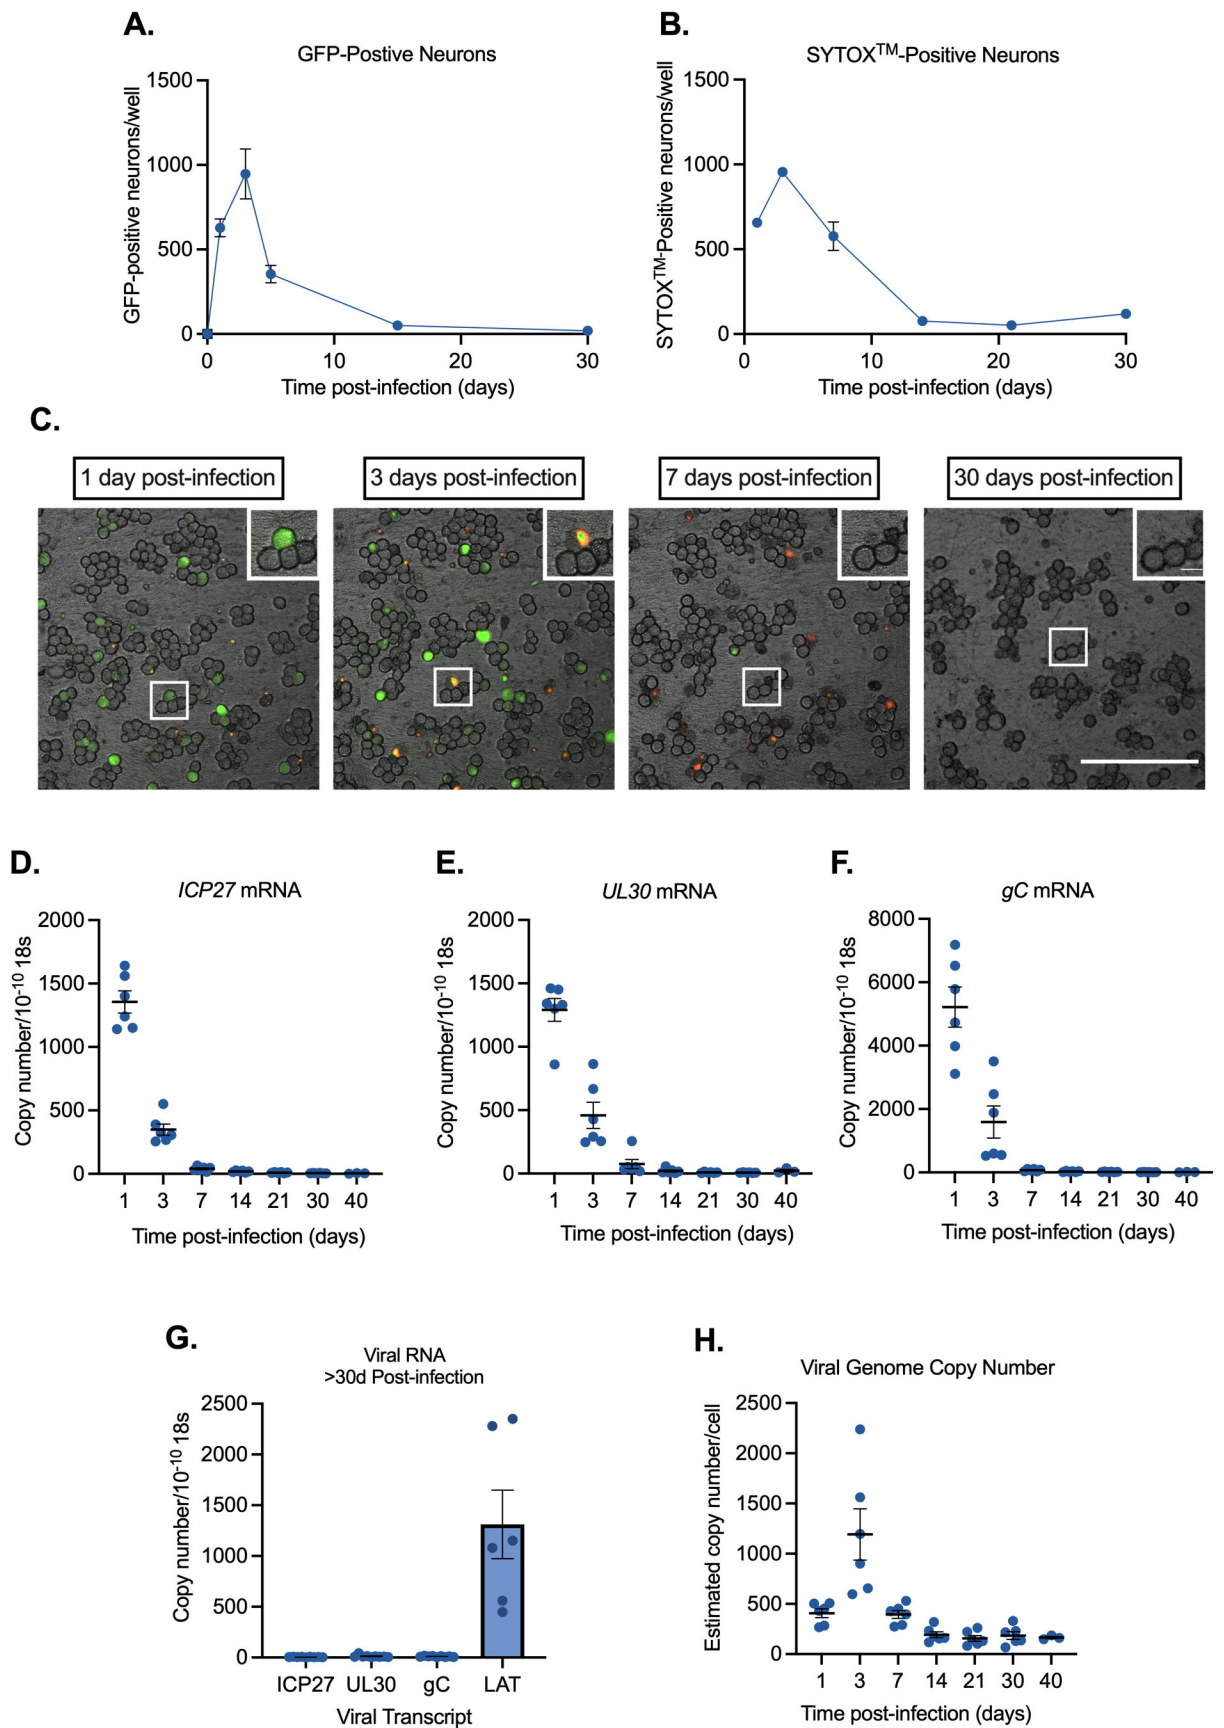

Figure 3



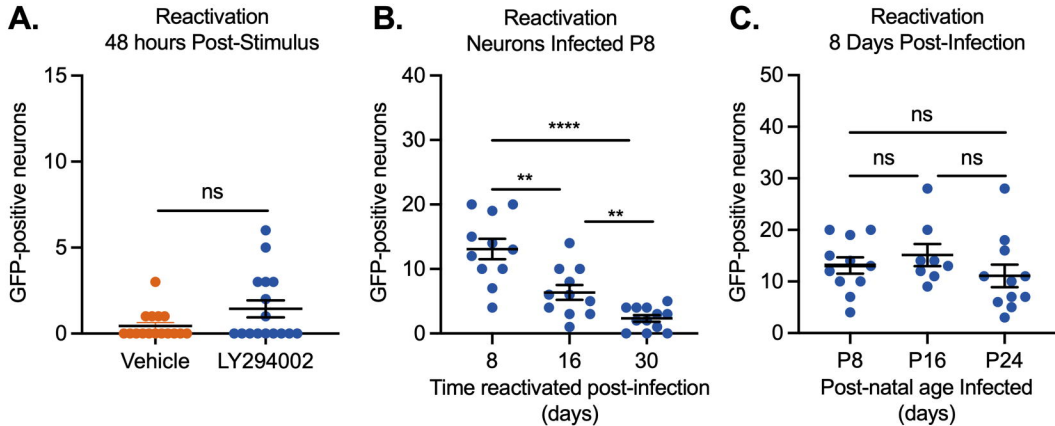

Figure 4

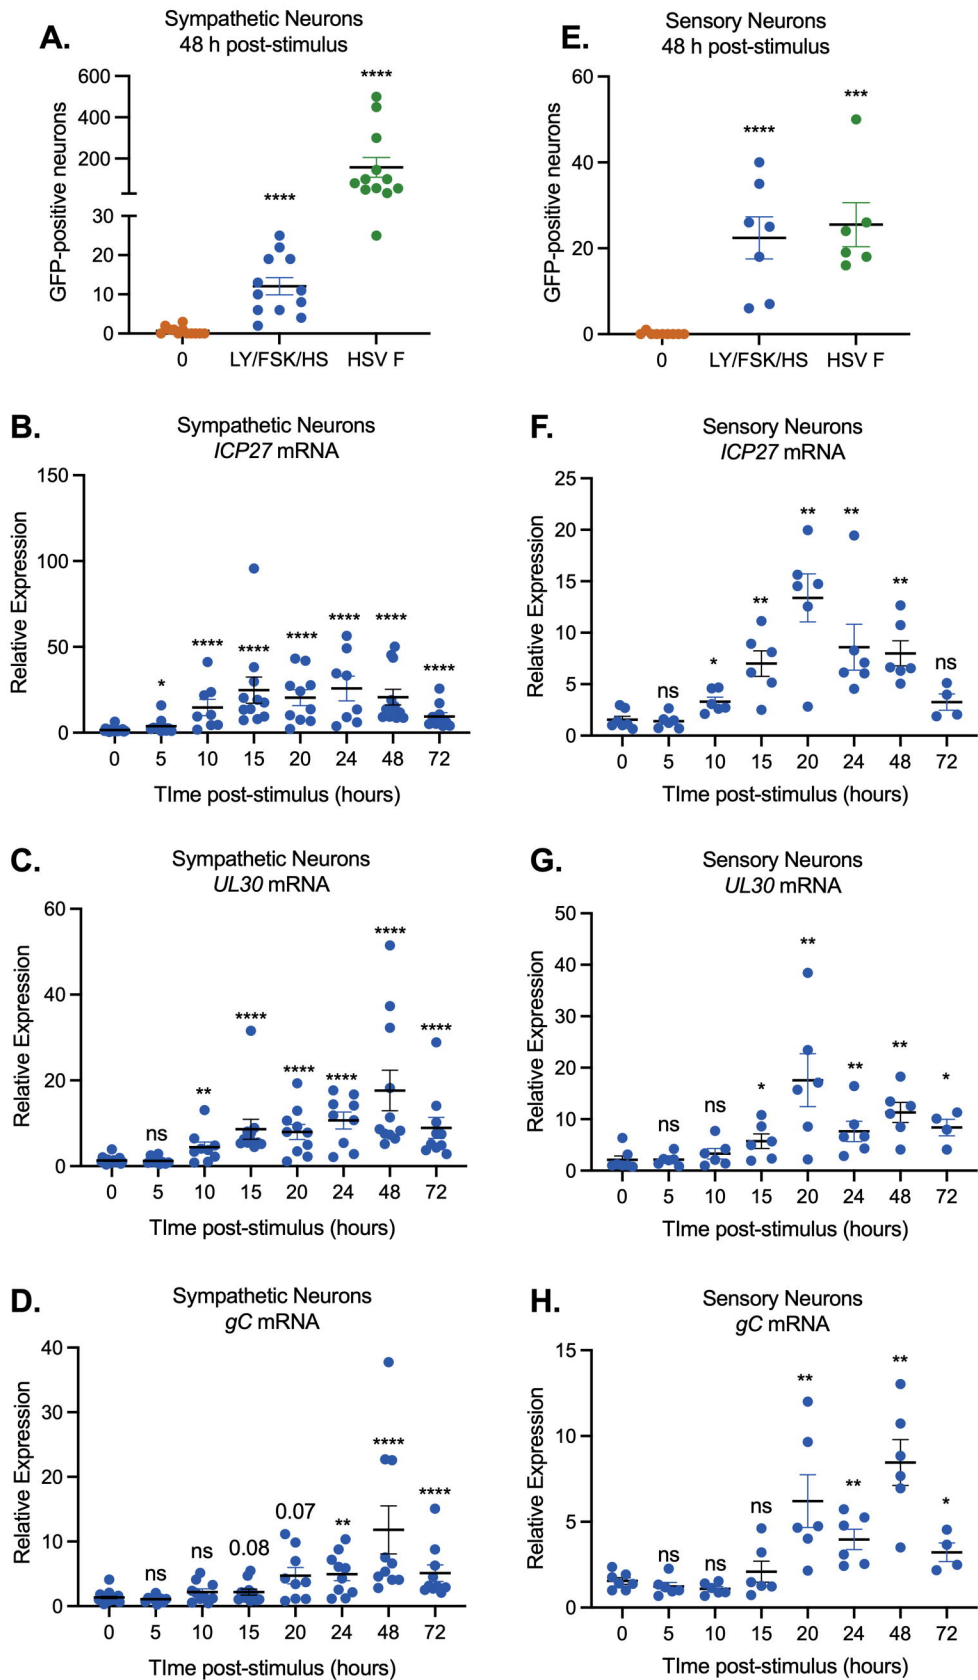

Figure 5

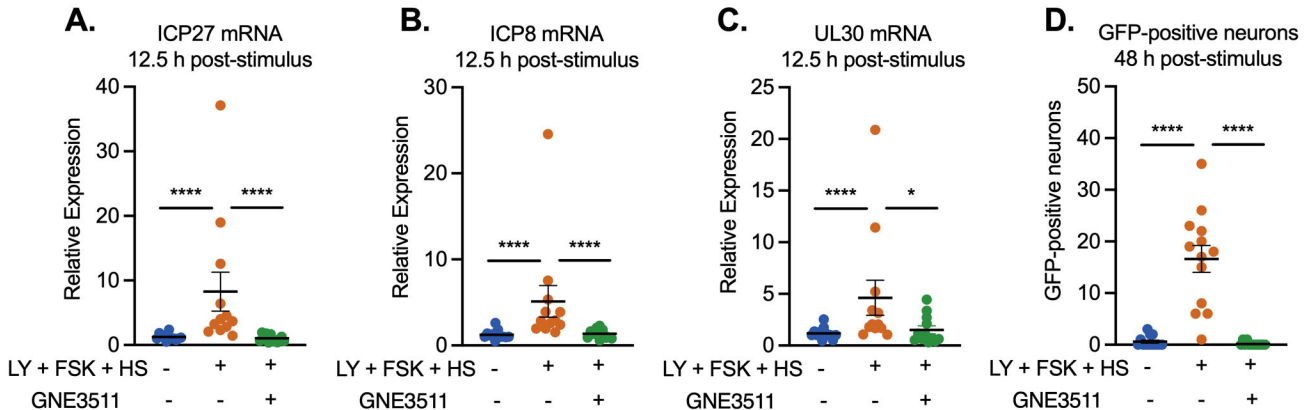

Figure 6

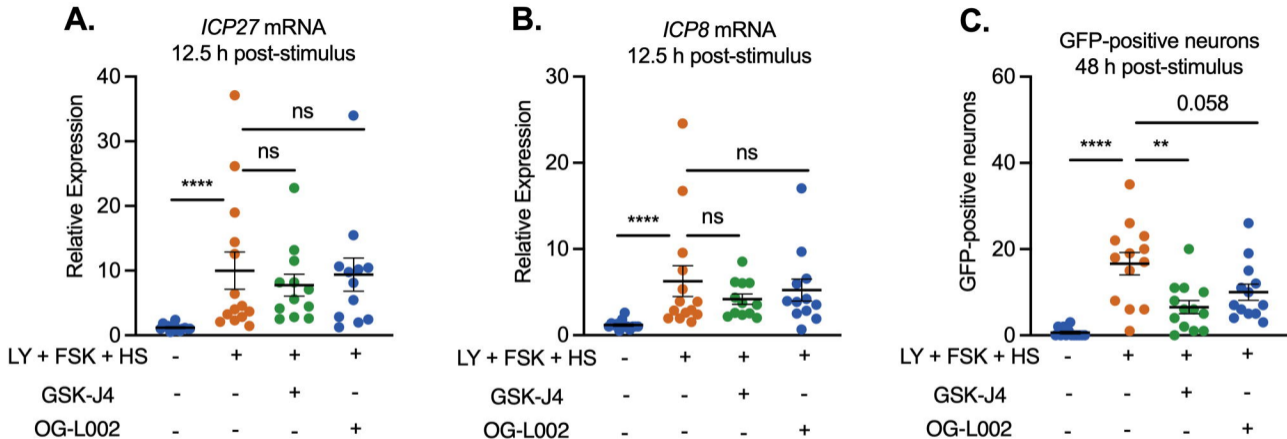

Figure 7

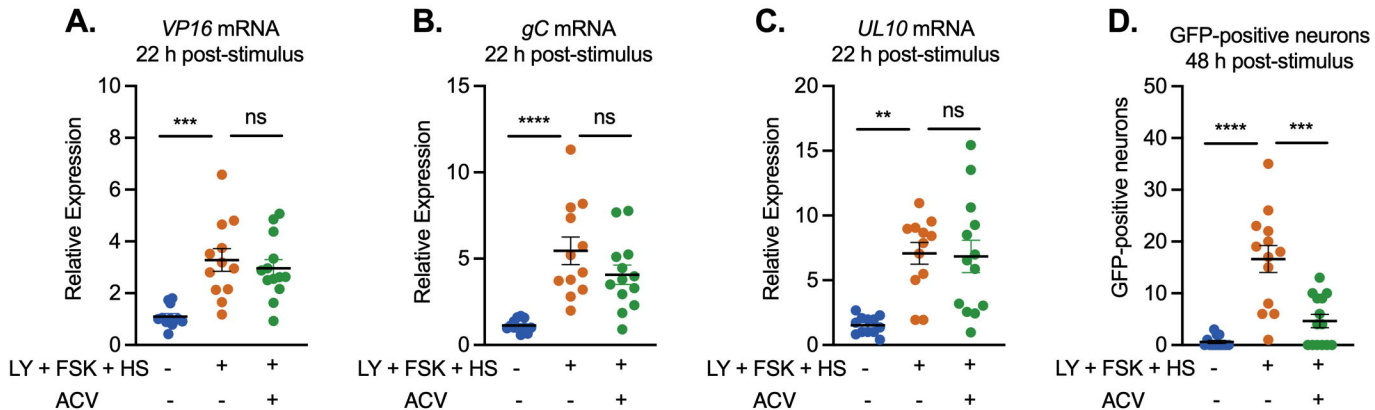

Figure 8
